# Supplementary material
Source: publisher figshare collection journal article supplement (https://acs.figshare.com/ndownloader/files/5065861)
Supplement: Supplementary file 1 [file 5065861]

**Supporting Information for:**

***Exploiting Phosphonate Chemistry in Metal-Mediated Dearomatization: Stereoselective  
Construction of Functionalized Spirolactams from Arene Ruthenium Complexes***

F. Christopher Pigge,\* John J. Coniglio, and Rashmi Dalvi

*Department of Chemistry, University of Iowa, Iowa City, IA 52242 and Department of Chemistry &  
Biochemistry, University of Missouri – St. Louis, St. Louis, MO 63121*

|                    |         |
|--------------------|---------|
| Experimental.....  | S2-S14  |
| References.....    | S14     |
| Spectral Data..... | S15-S40 |

**General Experimental.** All commercially available reagents and solvents were used as received unless otherwise noted. Tetrahydrofuran was either distilled from Na-benzophenone or passed through an activated alumina column, DMF was distilled from CaH<sub>2</sub> or passed through a column of activated molecular sieves. All reactions were performed in oven-dried glassware under a blanket of dry argon unless otherwise noted. Thin-layer chromatography was performed on silica gel 60 glass-backed TLC plates (250  $\mu$ m). All reactions were monitored by TLC for consumption of starting substrate. Radial chromatography was performed using 2 mm plates coated with TLC grade silica. <sup>1</sup>H- and <sup>13</sup>C-NMR spectra were obtained at 300 or 500 MHz as indicated. Chemical shifts ( $\delta$ ) are reported relative to residual solvent peaks or TMS. IR spectra were recorded on an FT-IR spectrophotometer equipped with an ATR attachment. Melting points were determined using a capillary melting point apparatus and are uncorrected. High resolution mass spectra were obtained using electron impact ionization (EI), fast atom bombardment (FAB), or electrospray ionization (ESI).

**Stereochemical Assignments.** Olefin stereochemistry (*Z*) of spirocyclic compounds was determined experimentally for cyclohexadienyl complexes **5** and **9** *via* 2D NOESY NMR spectroscopy. Olefin geometry for the remaining compounds was assigned by analogy. The NOESY spectrum was also obtained for dienol (-)-**22** in order to determine the regio- and stereochemistry of hydroxyl addition. The structural assignment of this latter compound along with dienol **19** were confirmed by single crystal X-ray diffractometry.<sup>1</sup> Stereochemical assignments for **16** and **18** were made by analogy.

## Preparation of $\eta^6$ -arene ruthenium complexes:

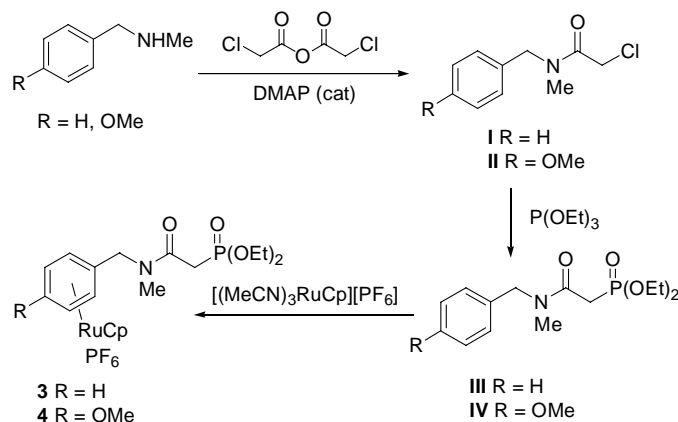

### N-Benzyl-N-methyl chloroacetamide (I) and N-4-methoxybenzyl-N-methyl chloroacetamide (II).

To a mixture of chloroacetic anhydride (2.79 g, 15.8 mmol) and DMAP (catalytic amount) in ~10 mL THF was added dropwise a solution of N-methylbenzylamine (1.32 g, 10.6 mmol) in 5 mL THF. Once the addition was complete the reaction was maintained at rt for ~10 min. The solvent was removed *in vacuo* and the resulting yellow oil was partitioned between  $CH_2Cl_2$  and saturated aqueous  $NaHCO_3$ . The organic phase was separated and dried over anhyd.  $MgSO_4$ . Filtration and removal of the solvent gave a dark yellow oil that was further purified by flash column chromatography (1:1 EtOAc:Hexanes) to afford **I** as a light yellow oil (2.09 g, 100%).  $^1H$ -NMR (300 MHz,  $CDCl_3$ , mixture of rotamers)  $\delta$  2.96 (s, 1.2H), 2.99 (s, 1.8H), 4.11 (s, 0.8H), 4.14 (s, 1.2H), 4.59 (s, 2H), 7.20-7.35 (m, 5H).  $^{13}C$ -NMR (75 MHz,  $CDCl_3$ , mixture of rotamers)  $\delta$  34.6, 35.2, 41.1, 41.3, 51.5, 53.9, 126.6, 127.8, 128.1, 128.9, 129.2, 135.7, 136.3, 167.3, 167.5, 169.3. The methoxybenzyl derivative **II** was prepared similarly in 90% yield from 2.37 g of 4-methoxy-N-methylbenzylamine.  $^1H$ -NMR (300 MHz,  $CDCl_3$ , mixture of rotamers)  $\delta$  2.94 (s, 1H), 2.97 (s, 2H), 3.80 (s, 2H), 3.81 (s, 1H), 4.12 (s, 2H), 4.53 (s, 2H), 6.84-6.91 (m, 2H), 7.10-7.20 (m, 2H).  $^{13}C$ -

NMR (75 MHz, CDCl<sub>3</sub>, mixture of rotamers)  $\delta$  34.3, 35.0, 41.3, 41.6, 50.9, 53.3, 55.48, 55.5, 114.3, 114.6, 127.8, 128.0, 128.7, 129.7, 159.3, 166.7. IR (neat)  $\nu$  (cm<sup>-1</sup>) 1657.

**$\beta$ -Amidophosphonates **III** and **IV**.** Arbuzov reaction of **I** and **II** afforded phosphonates **III** and **IV**, respectively. The preparation of **III** is representative. Chloroacetamide **I** (5.54 g, 23.8 mmol) was mixed with P(OEt)<sub>3</sub> (6.5 mL) and heated to 100 °C for 12 h. After cooling to rt, excess P(OEt)<sub>3</sub> was removed *in vacuo* and the remaining residue was purified by flash column chromatography (EtOAc) to afford **III** as colorless oil (5.34 g, 75%). <sup>1</sup>H-NMR (300 MHz, CDCl<sub>3</sub>, mixture of rotamers)  $\delta$  1.34 (t,  $J$  = 7.1 Hz, 6H), 2.98 (s, 1.1H), 3.07 (d,  $J_{PH}$  = 22.1 Hz, 0.8H), 3.05 (s, 1.9H), 3.13 (d,  $J_{PH}$  = 22.1 Hz, 1.2H), 4.13-4.24 (m, 4H), 4.62 (s, 1.2H), 4.70 (s, 0.8H), 7.17-7.39 (m, 5H). <sup>13</sup>C-NMR (125 MHz, CDCl<sub>3</sub>, mixture of rotamers)  $\delta$  16.3, 16.4, 33.0, 33.1, 34.1, 34.1, 34.6, 36.1, 51.1, 54.3, 62.6, 62.6, 62.7, 126.3, 127.4, 127.9, 128.6, 129.0, 136.3, 136.9, 165.1, 165.2, 165.3, 165.4. IR (neat)  $\nu$  (cm<sup>-1</sup>) 1642, 1021. HRMS (EI) calcd for C<sub>14</sub>H<sub>22</sub>NO<sub>4</sub>P 299.1286 [M]<sup>+</sup>, found 299.1287.

Phosphonate **IV** was prepared in 93% yield from 1.0 g of **II** using an identical procedure. <sup>1</sup>H-NMR (300 MHz, CDCl<sub>3</sub>, mixture of rotamers)  $\delta$  1.33 (t,  $J$  = 7.5 Hz, 6H), 2.95 (d,  $J$  = 1.2 Hz, 1H), 3.02 (s, 2H), 3.08 (d  $J_{PH}$  = 21.0 Hz, 1.2H), 3.11 (d,  $J_{PH}$  = 21.0 Hz, 0.8H), 3.80 (d,  $J$  = 3.0 Hz, 3H), 4.12- 4.23 (m, 4H), 4.5 (s, 1.2H), 4.6 (s, 0.8 H), 6.83-6.90 (m, 2H), 7.18-7.21 (m, 2H). <sup>13</sup>C-NMR (75 MHz, CDCl<sub>3</sub>, mixture of rotamers)  $\delta$  16.4, 16.5, 32.7, 32.8, 34.2, 34.5, 34.6, 36.0, 50.6, 53.9, 55.4, 62.7, 62.8, 62.8, 114.1, 114.5, 127.8, 128.2, 129.1, 129.4, 159.1, 159.3, 165.0, 165.3, 165.4. IR (neat)  $\nu$  (cm<sup>-1</sup>) 1649, 1027. HRMS (EI) calcd for C<sub>15</sub>H<sub>24</sub>NO<sub>5</sub>P 329.1391 [M]<sup>+</sup>, found 329.1395.

**General procedure of the preparation of  $\eta^6$ -Arene ruthenium complexes** Arene complexes were prepared by treatment of arene ligands with equimolar amounts of [(MeCN)<sub>3</sub>RuCp][PF<sub>6</sub>] in 1,2-dichloroethane according to previously reported procedures.<sup>2</sup> Complex **3** (5.29 g, 82%) was obtained as a brown viscous semi-solid from 3.16 g (10.6 mmol) of **III** after filtration of the crude

product through a short plug of neutral alumina (acetone).  $^1\text{H}$ -NMR (500 MHz, acetone- $\text{d}_6$ )  $\delta$  1.31 (t,  $J = 7.0$  Hz, 6H), 3.22 (d,  $J_{\text{PH}} = 21.7$  Hz, 2H), 3.35 (s, 3H), 4.09-4.18 (m, 4H), 4.63 (s, 2H), 5.53 (s, 5H), 6.25-6.33 (m, 3H), 6.44 (d,  $J = 6.0$  Hz, 2H).  $^{13}\text{C}$ -NMR (125 MHz, acetone- $\text{d}_6$ )  $\delta$  16.7, 33.1, 34.1, 38.1, 50.3, 63.0, 82.1, 85.8, 86.2, 87.1, 103.3, 166.9. HRMS (FAB, NBA) calcd for  $\text{C}_{19}\text{H}_{27}\text{NO}_4\text{PRu}$  466.0721  $[\text{M}]^+$ , found 466.0718. Complex **4** (1.60 g, 92%) was obtained as pale brown solid from 0.90 g (2.72 mmol) of **IV**. Mp = 82-84 °C.  $^1\text{H}$ -NMR (300 MHz, acetone- $\text{d}_6$ )  $\delta$  1.31 (t,  $J = 7.5$  Hz, 6H), 3.21 (d,  $J_{\text{PH}} = 21.0$  Hz, 2H), 3.32 (s, 3H), 3.86 (s, 3H), 4.10-4.20 (m, 4H), 4.55 (s, 2H), 5.53 (s, 5H), 6.38-6.41 (m, 4H).  $^{13}\text{C}$ -NMR (75 MHz, acetone- $\text{d}_6$ )  $\delta$  17.1, 33.1, 34.9, 38.3, 50.2, 58.2, 63.4, 75.2, 82.1, 84.7, 86.2, 100.5, 135.6, 167.2. HRMS (FAB, NBA) calcd for  $\text{C}_{20}\text{H}_{29}\text{NO}_5\text{PRu}$  496.0826  $[\text{M}]^+$ , found 496.0832. Anal. Calcd for  $\text{C}_{20}\text{H}_{29}\text{NO}_3\text{Ru}\cdot\text{PF}_6$ : C 37.44, H 4.55, N 2.18. Found: C 37.68, H 4.49, N 2.30.

**General procedure for the preparation of spirolactam complexes 5-14.** The preparation of **5** is representative. A solution of **3** (341 mg, 0.56 mmol) in ~4 mL THF was added to NaH (60%, 78.2 mg, 1.2 mmol) at rt. The resulting mixture was maintained for 30 min, during which time the reaction turned golden yellow. Acetaldehyde (123 mg, 2.8 mmol) was added *via* syringe and the reaction was stirred at rt for another 30 min. The reaction was quenched with a few drops of  $\text{H}_2\text{O}$  and the solvent was removed *in vacuo*. The residue was dissolved in  $\text{CH}_2\text{Cl}_2$ , washed with brine, dried over anhyd.  $\text{MgSO}_4$ , filtered, and concentrated to afford a yellow solid. Purification by flash column chromatography gave **5** (138 mg, 70%). Spirocyclizations involving complex **4** were performed in a similar fashion except that DMF was used as the solvent.

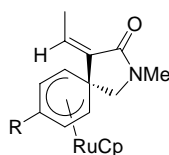

5 (R = H)  
6 (R = OMe)

**Complex 5.** 70%. Mp 189-190 °C.  $^1\text{H}$ -NMR (500 MHz,  $\text{CDCl}_3$ )  $\delta$  1.99 (d,  $J = 7.3$  Hz, 3H), 2.63 (d,  $J = 5.3$  Hz, 2H), 2.86 (s, 3H), 3.25 (s, 2H), 4.46 (t,  $J = 5.3$  Hz, 2H), 4.80 (s, 5H), 5.55 (q,  $J = 7.3$  Hz, 1H), 5.76 (t,  $J = 5.3$  Hz, 1H).  $^{13}\text{C}$ -NMR (125 MHz,  $\text{CDCl}_3$ )  $\delta$  13.2, 29.7, 38.1, 45.9, 64.9, 75.5, 76.2, 79.6, 132.5, 142.4, 168.1. IR (neat)  $\nu$  ( $\text{cm}^{-1}$ ) 1672. HRMS (EI) calcd for  $\text{C}_{17}\text{H}_{19}\text{NORu}$  355.0510  $[\text{M}]^+$ , found 355.0513. Anal. Calcd for  $\text{C}_{17}\text{H}_{19}\text{NORu}$ : C 57.61, H 5.40, N 3.95. Found: C 57.55, H 5.44, N 3.98.

**Complex 6.** 71%. Mp 148-149 °C.  $^1\text{H}$ -NMR (300 MHz,  $\text{CDCl}_3$ )  $\delta$  1.91 (d,  $J = 7.3$  Hz, 3H), 2.39 (dd,  $J = 5.1, 1.3$  Hz, 2H), 2.78 (s, 3H), 3.29 (s, 2H), 3.63 (s, 3H), 4.66 (dd,  $J = 5.1, 1.3$  Hz, 2H), 4.89 (s, 5H), 5.54 (q  $J = 7.26$ , 1H).  $^{13}\text{C}$ -NMR (75 MHz,  $\text{CDCl}_3$ )  $\delta$  13.1, 29.6, 32.2, 47.4, 57.6, 63.9, 65.6, 76.1, 132.2, 132.7, 141.6, 168.0. IR (neat)  $\nu$  ( $\text{cm}^{-1}$ ) 1678. HRMS (FAB, NBA) calcd for  $\text{C}_{18}\text{H}_{21}\text{NO}_2\text{Ru}\cdot\text{Na}$  408.0513  $[\text{M}+\text{Na}]^+$ , found 408.0519. Anal. Calcd for  $\text{C}_{18}\text{H}_{21}\text{NO}_2\text{Ru}$ : C 56.24, H 5.51, N 3.64. Found: C 56.46, H 5.56, N 3.58.

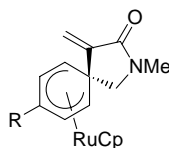

7 (R = H)  
8 (R = OMe)

**Complex 7.** From **3** and paraformaldehyde, 74%. Mp 157-158 °C.  $^1\text{H}$ -NMR (300 MHz,  $\text{CDCl}_3$ )  $\delta$  2.61 (d,  $J = 6.1$  Hz, 2H), 2.91 (s, 3H), 3.30 (s, 2H), 4.48 (dd,  $J = 6.1, 4.8$  Hz, 2H), 4.82 (s, 5H), 4.98 (d,  $J = 1.0$  Hz, 1H), 5.65 (d,  $J = 1.0$  Hz, 1H), 5.83 (t,  $J = 4.8$  Hz, 1H).  $^{13}\text{C}$ -NMR (125 MHz,  $\text{CDCl}_3$ )

$\delta$  30.0, 36.4, 45.4, 64.6, 75.7, 76.1, 80.1, 115.6, 150.9, 167.3. IR (neat)  $\nu$  ( $\text{cm}^{-1}$ ) 1678. HRMS (EI) calcd for  $\text{C}_{16}\text{H}_{17}\text{NORu}$  341.0353  $[\text{M}]^+$ , found 341.0352. Anal. Calcd for  $\text{C}_{16}\text{H}_{17}\text{NORu}$ : C 56.46, H 5.03, N 4.11. Found: C 56.73, H 4.98, N 4.13.

**Complex 8.** From **4** and paraformaldehyde, 70%. Mp 135-136 °C.  $^1\text{H}$ -NMR (300 MHz,  $\text{CDCl}_3$ )  $\delta$  2.38 (d,  $J$  = 6.0 Hz, 2H), 2.95 (s, 3H), 3.28 (s, 2H), 3.74 (s, 3H), 4.65 (d,  $J$  = 6.0 Hz, 2H), 4.87 (s, 5H), 5.05 (s, 1H), 5.66 (s, 1H).  $^{13}\text{C}$ -NMR (75 MHz,  $\text{CDCl}_3$ )  $\delta$  30.1, 30.7, 46.9, 57.7, 63.7, 65.5, 76.3, 115.6, 133.3, 150.0, 167.3. IR (neat)  $\nu$  ( $\text{cm}^{-1}$ ) 1687. HRMS (FAB, NBA) calcd for  $\text{C}_{17}\text{H}_{19}\text{NO}_2\text{Ru}\cdot\text{Na}$  394.0357  $[\text{M}+\text{Na}]^+$ , found 394.0356. Anal. Calcd for  $\text{C}_{17}\text{H}_{19}\text{NO}_2\text{Ru}$ : C 55.12, H 5.17, N 3.78. Found: C 55.14, H 5.40, N 3.64.

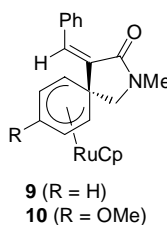

**Complex 9.** From **3** and benzaldehyde, 59%. Mp 196-198 °C.  $^1\text{H}$ -NMR (500 MHz,  $\text{CDCl}_3$ )  $\delta$  2.73 (d,  $J$  = 6.1 Hz, 2H), 2.91 (s, 3H), 3.37 (s, 2H), 4.55 (t,  $J$  = 5.5 Hz, 2H), 4.83 (s, 5H), 5.82 (t,  $J$  = 4.5 Hz, 1H), 6.24 (s, 1H), 7.18-7.28 (m, 3H), 7.80 (d,  $J$  = 7.6 Hz, 2H).  $^{13}\text{C}$ -NMR (125 MHz,  $\text{CDCl}_3$ )  $\delta$  30.2, 37.9, 47.5, 65.1, 76.0, 76.5, 79.6, 127.8, 128.2, 130.8, 134.5, 135.2, 141.8, 166.4. IR (neat)  $\nu$  ( $\text{cm}^{-1}$ ) 1669. HRMS (EI) calcd for  $\text{C}_{22}\text{H}_{21}\text{NORu}$  417.0666  $[\text{M}]^+$ , found 417.0674. Anal. Calcd for  $\text{C}_{22}\text{H}_{21}\text{NORu}$ : C 63.45, H 5.08, N 3.36. Found: C 63.22, H 5.14, N 3.12.

**Complex 10.** From **4** and benzaldehyde, 80%. Mp 197-200 °C.  $^1\text{H}$ -NMR (300 MHz,  $\text{CDCl}_3$ )  $\delta$  2.45 (d,  $J$  = 6.3 Hz, 2 H), 2.91 (s, 3H), 3.36 (s, 2H), 3.67 (s, 3H), 4.73 (d,  $J$  = 6.3 Hz, 2H), 4.89 (s,

5H), 6.30 (s, 1H), 7.25 (m, 3H), 7.79 (d,  $J = 7.0$  Hz, 2H).  $^{13}\text{C}$ -NMR (75 MHz,  $\text{CDCl}_3$ )  $\delta$  30.2, 32.1, 49.0, 57.7, 64.2, 66.0, 76.4, 127.2, 130.8, 132.9, 134.3, 135.1, 141.2, 166.4. IR (neat)  $\nu$  ( $\text{cm}^{-1}$ ) 1677. HRMS (FAB, NBA) calcd for  $\text{C}_{23}\text{H}_{23}\text{NO}_2\text{Ru}\cdot\text{Na}$  470.0670,  $[\text{M}+\text{Na}]^+$ , found 470.0676. Anal. Calcd for  $\text{C}_{23}\text{H}_{23}\text{NO}_2\text{Ru}$ : C 61.87, H 5.19, N 3.14. Found: C 62.15, H 5.22, N 3.22

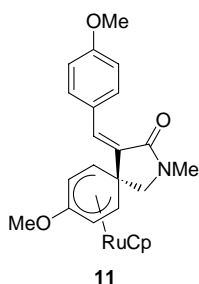

**Complex 11.** From **4** and *p*-anisaldehyde, 81%. Mp 190-191 °C.  $^1\text{H}$ -NMR (300 MHz,  $\text{CDCl}_3$ )  $\delta$  2.49 (d,  $J = 6.0$  Hz, 2H), 2.90 (s, 3H), 3.35 (s, 2H), 3.67 (s, 3H), 3.79 (s, 3H), 4.72 (d,  $J = 6.0$  Hz, 2H), 4.88 (s, 5H), 6.22 (s, 1H), 6.81 (d,  $J = 9.0$  Hz, 2H), 7.87 (d,  $J = 9.0$  Hz, 2H).  $^{13}\text{C}$ -NMR (75 MHz,  $\text{CDCl}_3$ )  $\delta$  30.2, 32.5, 48.9, 55.4, 57.7, 64.3, 66.0, 76.2, 113.2, 127.9, 132.7, 132.8, 134.1, 139.3, 159.7, 166.7. IR (neat)  $\nu$  ( $\text{cm}^{-1}$ ) 1666. HRMS (FAB, NBA) calcd for  $\text{C}_{24}\text{H}_{25}\text{NO}_3\text{Ru}\cdot\text{Na}$  500.0776  $[\text{M}+\text{Na}]^+$ , found 500.0782. Anal calcd for  $\text{C}_{24}\text{H}_{25}\text{NO}_3\text{Ru}$ : C 60.49, H 5.29, N 2.94. Found: C 60.51, H 5.25, N 2.89.

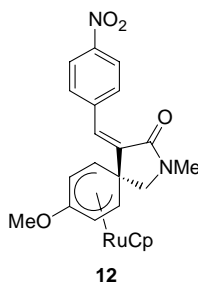

**Complex 12.** From **4** and *p*-nitrobenzaldehyde, 55%. Mp 189-190 °C.  $^1\text{H}$ -NMR (300 MHz,  $\text{CDCl}_3$ )  $\delta$  2.48 (d,  $J = 9.0$  Hz, 2H), 2.92 (s, 3H), 3.40 (s, 2H), 3.68 (s, 3H), 4.74 (d,  $J = 9.0$  Hz, 2H),



4.92 (s, 5H), 6.31 (s, 1H), 7.87(d,  $J = 9.0$  Hz, 2H), 8.11 (d,  $J = 9.0$  Hz, 2H).  $^{13}\text{C}$ -NMR (75 MHz,  $\text{CDCl}_3$ )  $\delta$  30.3, 31.1, 49.1, 57.7, 64.0, 65.8, 76.6, 122.9, 131.3, 131.3, 133.05, 141.7, 144.3, 147.0, 165.7. IR (neat)  $\nu$  ( $\text{cm}^{-1}$ ) 1677. HRMS (FAB, NBA) calcd for  $\text{C}_{23}\text{H}_{22}\text{N}_2\text{O}_4\text{Ru}\cdot\text{Na}$  515.0521  $[\text{M}+\text{Na}]^+$ , found 515.0527. Anal. Calcd for  $\text{C}_{23}\text{H}_{22}\text{N}_2\text{O}_4\text{Ru}$ : C 56.21, H 4.51, N 5.70. Found: C 56.56, H 4.91, N 5.28.

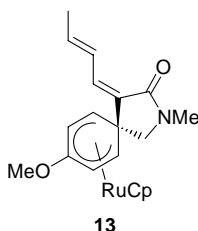

**Complex 13.** From **4** and crotonaldehyde, 76%. Mp 182-184 °C.  $^1\text{H}$ -NMR (300 MHz,  $\text{CDCl}_3$ )  $\delta$  1.77 (d,  $J = 9.0$  Hz, 3H), 2.38 (d,  $J = 7.5$  Hz, 2H), 2.87 (s, 3H), 3.26 (s, 2H), 3.68 (s, 3H), 4.65 (d,  $J = 7.5$  Hz, 2H), 4.88 (s, 5H), 5.92 (m, 1H), 5.95 (d,  $J = 12.0$  Hz, 1H), 7.46 (m, 1H).  $^{13}\text{C}$ -NMR (75 MHz,  $\text{CDCl}_3$ )  $\delta$  14.3, 29.8, 32.1, 47.3, 57.7, 64.1, 65.8, 76.2, 127.6, 132.9, 134.0, 135.5, 137.9, 167.7. IR (neat)  $\nu$  ( $\text{cm}^{-1}$ ) 1672. HRMS (ESI) calcd for  $\text{C}_{20}\text{H}_{24}\text{NO}_2\text{Ru}$  412.0851  $[\text{M}+\text{H}]^+$ , found 412.0856.

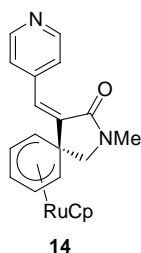

**Complex 14.** From **3** and 4-pyridylcarboxaldehyde, 74%. Mp 191-192 °C.  $^1\text{H}$ -NMR (300 MHz,  $\text{CDCl}_3$ )  $\delta$  2.71 (d,  $J = 6.0$  Hz, 2H), 2.92 (s, 3H), 3.40 (s, 2H), 4.56 (dd,  $J = 6.0, 4.8$  Hz, 2H), 4.85 (s, 5H), 5.84 (t,  $J = 4.8$  Hz, 1H), 6.13 (s, 1H), 7.59 (dd,  $J = 4.6, 1.6$  Hz, 2H), 8.49 (dd,  $J = 4.6, 1.6$  Hz,

2H).  $^{13}\text{C}$ -NMR (75 MHz,  $\text{CDCl}_3$ )  $\delta$  30.2, 36.8, 47.4, 64.7, 75.6, 76.3, 79.8, 124.6, 131.0, 142.5, 145.4, 149.3, 165.6. IR (neat)  $\nu$  ( $\text{cm}^{-1}$ ) 1668. HRMS (EI) calcd for  $\text{C}_{21}\text{H}_{20}\text{N}_2\text{ORu}$  418.0618  $[\text{M}]^+$ , found 418.0619. Anal. Calcd for  $\text{C}_{21}\text{H}_{20}\text{N}_2\text{ORu}$ : C 60.42, H 4.83, N 6.71. Found: C 60.60, H 4.81, N 6.72.

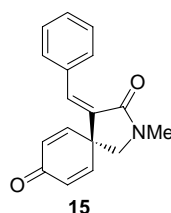

**Dienone 15.** To a stirred solution of **10** (50 mg, 0.11 mmol) in ~5mL THF,  $\text{CuCl}_2$  (45 mg, 0.33 mmol) was added at rt. A dark brown solid formed in the reaction. The reaction was stirred for 30 min, after which time TLC indicated complete consumption of starting material. Solids were removed by gravity filtration and the filtrate was partitioned between  $\text{CH}_2\text{Cl}_2$  and water. The layers were separated and the organic phase was washed with brine, dried over anhyd.  $\text{MgSO}_4$ , and concentrated *in vacuo* to afford yellow oil which was then subjected to flash column chromatography (EtOAc:Hexanes, 1:1) to give **15** (24 mg, 79 %) as a white solid. Mp 155-156  $^\circ\text{C}$ .  $^1\text{H}$ -NMR (300 MHz,  $\text{CDCl}_3$ )  $\delta$  3.03 (s, 3H), 3.57 (s, 2H), 6.37 (d,  $J$  = 10.0 Hz, 2H), 6.46 (s, 1H), 6.94 (d,  $J$  = 10.0Hz, 2 H), 7.33 (m, 3H), 7.89 (dd,  $J$  = 7.5, 2.1, Hz, 2H).  $^{13}\text{C}$ -NMR (75 MHz,  $\text{CDCl}_3$ )  $\delta$  30.6, 47.0, 54.4, 128.2, 128.7, 129.7, 131.4, 133.5, 138.0, 149.8, 165.6, 185.5. IR (neat)  $\nu$  ( $\text{cm}^{-1}$ ) 1677, 1666. HRMS (FAB, NBA) calcd for  $\text{C}_{17}\text{H}_{16}\text{NO}_2$  266.1181  $[\text{M}+\text{H}]^+$ , found 266.1181. Anal. Calcd for  $\text{C}_{17}\text{H}_{15}\text{NO}_2$ : C 76.96, H 5.70, N 5.28. Found: C 76.69, H 5.84, N 5.04.

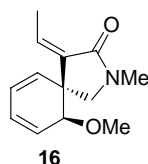

**Methoxy diene 16.** To a stirred solution of **5** (200 mg, 0.564 mmol) in ~5 mL methanol under 1 atm of CO (balloon), CuBr<sub>2</sub> (0.34 g, 1.55 mmol) in 1 mL methanol was added dropwise *via* syringe. The reaction initially turned dark red, then gradually changed to pale yellow over a period of 2 h. The solvent was removed *in vacuo*. The residue was dissolved in CH<sub>2</sub>Cl<sub>2</sub>, washed with brine, dried over anhyd. MgSO<sub>4</sub>, filtered and concentrated to give a yellow oil. Purification by flash column chromatography gave **16** (76 mg, 62%) as a colorless oil along with RuCp(CO)<sub>2</sub>Br (**17**, 60%) as yellow needles whose spectral properties matched those previously reported.<sup>3</sup> <sup>1</sup>H-NMR (300 MHz, CDCl<sub>3</sub>) δ 2.23 (d, *J* = 9.0 Hz, 3H), 2.88 (s, 3H), 3.17 (d, *J* = 10.5 Hz, 1H), 3.30 (d, *J* = 10.5 Hz, 1H), 3.34 (s, 3H), 3.71 (d, *J* = 6.0 Hz, 1H), 5.63 (m, 1H), 5.90 (m, 1H), 6.01 (m, 2H), 6.11 (q, *J* = 7.0 Hz, 1H). <sup>13</sup>C-NMR (75 MHz, CDCl<sub>3</sub>) δ 13.6, 29.7, 46.2, 55.7, 58.4, 80.6, 124.2, 124.9, 125.07, 131.1, 134.2, 135.1, 168.6. IR (neat) ν (cm<sup>-1</sup>) 1665. HRMS (ESI) calcd for C<sub>13</sub>H<sub>18</sub>NO<sub>2</sub> 220.1338 [M+H]<sup>+</sup>, found 220.1338.

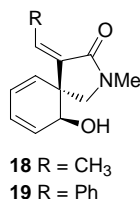

**Dienol 18.** To a stirred solution of **5** (50 mg, 0.14 mmol) in 4 mL THF under 1 atm of CO (balloon), CuBr<sub>2</sub> (85 mg, 0.38 mmol) in 1 mL of H<sub>2</sub>O was added *via* syringe. The reaction became dark red, then pale yellow over a period of 2 h. Workup of the reaction as described for **16** above and purification by flash column chromatography (1:1 Hexanes:EtOAc) gave **18** (19 mg, 65%) as a white crystalline solid along with RuCp(CO)<sub>2</sub>Br (62%) as yellow needles. Mp 105-107 °C. <sup>1</sup>H-NMR

(300 MHz, CDCl<sub>3</sub>)  $\delta$  2.25 (d,  $J$  = 9.0 Hz, 3H), 2.88 (s, 3H), 3.21 (d,  $J$  = 10.5 Hz, 1H), 3.36 (d,  $J$  = 10.5 Hz, 1H), 4.12 (d,  $J$  = 3.0 Hz, 1H), 5.62 (m, 1H), 5.82 (m, 1H), 6.01 (m, 2H), 6.18 (q,  $J$  = 9.0 Hz, 1H). <sup>13</sup>C-NMR (75 MHz, CDCl<sub>3</sub>)  $\delta$  13.6, 29.8, 47.0, 55.3, 70.9, 124.4, 125.0, 127.3, 131.0, 133.5, 168.2. IR (neat)  $\nu$  (cm<sup>-1</sup>) 1677, 3377. Anal. Calcd for C<sub>12</sub>H<sub>15</sub>NO<sub>2</sub>: C 70.22, H 7.37, N 6.82. Found: C 69.70 H 7.21, N 6.68.

**Dienol 19.** Dienol **19** was prepared from **9** using the procedure described above. 70%. Mp 130–132 °C. <sup>1</sup>H-NMR (300 MHz, CDCl<sub>3</sub>)  $\delta$  2.87 (s, 3H), 3.28 (d,  $J$  = 9.0 Hz, 1H), 3.39 (d,  $J$  = 9.0 Hz, 1H), 4.04 (d,  $J$  = 6.0 Hz, 1H), 5.74 (d,  $J$  = 7.5 Hz, 1H), 5.86 (m, 1H), 6.12 (m, 2H), 6.82 (s, 1H), 7.31 (m, 3H), 7.91 (d,  $J$  = 9.0 Hz, 2H). <sup>13</sup>C-NMR (75 MHz, CDCl<sub>3</sub>)  $\delta$  30.1, 48.1, 54.2, 70.1, 124.8, 126.6, 127.8, 128.7, 131.0, 131.4, 132.8, 134.2, 137.1, 166.4. IR (neat)  $\nu$  (cm<sup>-1</sup>) 1665, 3300. Anal. Calcd for C<sub>17</sub>H<sub>17</sub>NO<sub>2</sub>: C 76.38, H 6.41, N 5.24. Found: C 75.66, H 6.64, N 4.98.

#### Preparation of $\eta^6$ -arene ruthenium complex **20**:

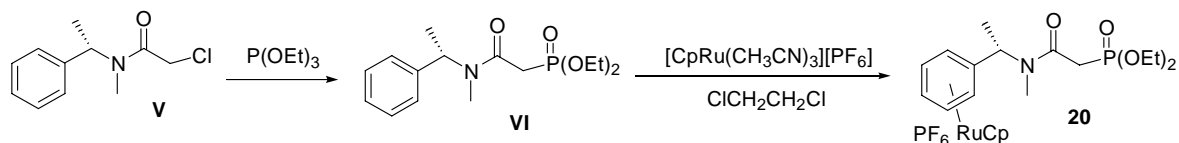

**$\beta$ -Amidophosphonate VI** Arbuzov reaction of **V**<sup>4</sup> afforded phosphonate **VI**. Chloroacetamide **V** (2.51 g, 11.8 mmol) was mixed with P(OEt)<sub>3</sub> (3.14 mL, 17.8 mmol) and heated to 100 °C for 12 h. After cooling to rt, excess P(OEt)<sub>3</sub> was removed *in vacuo* and the remaining oily residue was purified by flash column chromatography (EtOAc) to afford **VI** as colorless oil (3.55 g, 96%). [ $\alpha$ ]<sub>D</sub> = –96.8 ( $c$  = 0.008, MeOH). <sup>1</sup>H-NMR (300 MHz, CDCl<sub>3</sub>, mixture of rotamers)  $\delta$  1.34 (m, 6H), 1.50 (d,  $J$  = 9.0 Hz, 2H), 1.64 (d,  $J$  = 6.0 Hz, 1H), 2.70 (s, 1H), 2.77 (s, 2H), 3.53 (m, 2H), 4.19 (m, 4H), 5.32 (q,  $J$  = 9.0 Hz, 0.3H), 6.05 (q,  $J$  = 6.0 Hz, 0.7H), 7.30 (m, 5H). <sup>13</sup>C-NMR (75 MHz, CDCl<sub>3</sub>,

mixture of rotamers)  $\delta$  15.5, 16.2, 16.3, 16.3, 17.7, 28.3, 30.6, 32.9, 34.4, 34.7, 50.6, 55.7, 62.5, 126.4, 127.1, 127.2, 127.4, 128.3, 128.6, 139.9, 140.1, 164.9, 164.9. IR (neat)  $\nu$  ( $\text{cm}^{-1}$ ) 1641. HRMS (FAB, NBA) calcd for  $\text{C}_{15}\text{H}_{25}\text{NOP}$  314.1521  $[\text{M}+\text{H}]^+$ , found 314.1521.

**$\eta^6$ -Arene ruthenium complex 20.** The  $\eta^6$ -arene complex was prepared by using the general procedure given previously. Complex **20** (1.54 g, 82%) was obtained as a brown viscous semi-solid from 0.93 g (2.99 mmol) of **VI** after filtration of the crude product through a short plug of neutral alumina (acetone).  $[\alpha]_{\text{D}} = +78.4$  ( $c = 0.006$ , MeOH).  $^1\text{H-NMR}$  (500 MHz, acetone- $\text{d}_6$ )  $\delta$  1.31 (t,  $J = 7.5$  Hz, 6H), 1.58 (d,  $J = 9.0$  Hz, 3H), 2.93 (m, 1H), 3.16 (s, 3H), 3.35 (m, 1H), 4.14 (m, 4 H), 5.5 (s, 5H), 5.75 (q,  $J = 9.0$  Hz, 1H), 6.33 (m, 4H), 6.53 (d,  $J = 3.0$  Hz, 1H).  $^{13}\text{C-NMR}$  (75 MHz, acetone- $\text{d}_6$ )  $\delta$  16.7, 32.1, 33.1, 34.8, 51.2, 63.1, 62.9, 82.1, 85.2, 85.6, 86.0, 86.3, 107.5, 166.6. HRMS (FAB, NBA) calcd for  $\text{C}_{20}\text{H}_{29}\text{NO}_4\text{PRu}$  480.0878  $[\text{M}]^+$ , found 480.0883.

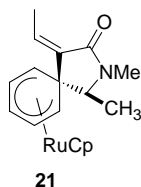

**Complex 21.** This complex was prepared using the general spirocyclization procedure. 74%. Mp 202-204 °C.  $[\alpha]_{\text{D}} = -77.2$  ( $c = 0.002$ , MeOH).  $^1\text{H-NMR}$  (300 MHz,  $\text{CDCl}_3$ )  $\delta$  1.08 (d,  $J = 9.0$  Hz, 3H), 1.97 (d,  $J = 6.0$  Hz, 3H), 2.46 (d,  $J = 6.0$  Hz, 1H), 2.72 (d,  $J = 6.0$  Hz, 1H), 2.87 (s, 3H), 3.36 (q,  $J = 6.0$  Hz, 1H), 4.24 (t,  $J = 4.5$  Hz, 1H), 4.71 (t,  $J = 6.0$  Hz, 1H), 4.80 (s, 5H), 5.43 (q,  $J = 6.0$  Hz, 1H), 5.72 (t,  $J = 4.5$  Hz, 1H).  $^{13}\text{C-NMR}$  (75 MHz,  $\text{CDCl}_3$ )  $\delta$  13.2, 14.4, 28.0, 30.1, 41.5, 50.3, 67.7, 75.6, 79.6, 131.8, 140.3, 167.1. IR (neat)  $\nu$  ( $\text{cm}^{-1}$ ) 1665. Anal. Calcd. for  $\text{C}_{18}\text{H}_{21}\text{NORu}$ : C 58.68, H 5.74, N 3.80. Found: C 59.01, H 5.90, N 3.70.

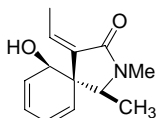

(-)-22

**Dienol (-)-22.** This material was obtained from **21** using the procedures described for the preparation of **18-19**. 55%. Mp 155-157 °C.  $[\alpha]_D = -186.1$  ( $c = 0.003$ ,  $\text{CHCl}_3$ ).  $^1\text{H-NMR}$  (300 MHz,  $\text{CDCl}_3$ )  $\delta$  1.04 (d,  $J = 9.0$  Hz, 3H), 2.29 (d,  $J = 9.0$  Hz, 3H), 2.89 (s, 3H), 3.47 (q,  $J = 6.0$  Hz, 1H), 3.80 (d,  $J = 3.0$  Hz, 1H), 5.60 (d, 9.0 Hz, 1H), 5.95 (m, 1H), 6.13 (m, 3H).  $^{13}\text{C-NMR}$  (75 MHz,  $\text{CDCl}_3$ )  $\delta$  13.8, 16.7, 28.2, 51.7, 57.2, 68.4, 125.8, 125.9, 126.0, 130.7, 131.9, 135.9, 168.1. IR (neat)  $\nu$  ( $\text{cm}^{-1}$ ) 1663, 3412. HRMS (ESI) calcd for  $\text{C}_{13}\text{H}_{18}\text{NO}_2$  220.1338  $[\text{M}+\text{H}]^+$ , found 220.1336.

## References

1. Pigge, F. C.; Coniglio, J. J.; Dalvi, R.; Rath, N. P. unpublished results.
2. Gill, T. P.; Mann, K. R. *Organometallics* **1982**, *1*, 485. Kündig, E. P.; Monnier, F. R. *Adv. Synth. Catal.* **2004**, *346*, 901.
3. Haines, R. J.; du Preez, A. L. *J. Chem. Soc., Dalton Trans.* **1972**, 944.
4. Pallavicini, M.; Valoti, E.; Villa, L.; Resta, I. *Tetrahedron: Asymmetry* **1994**, *5*, 363.

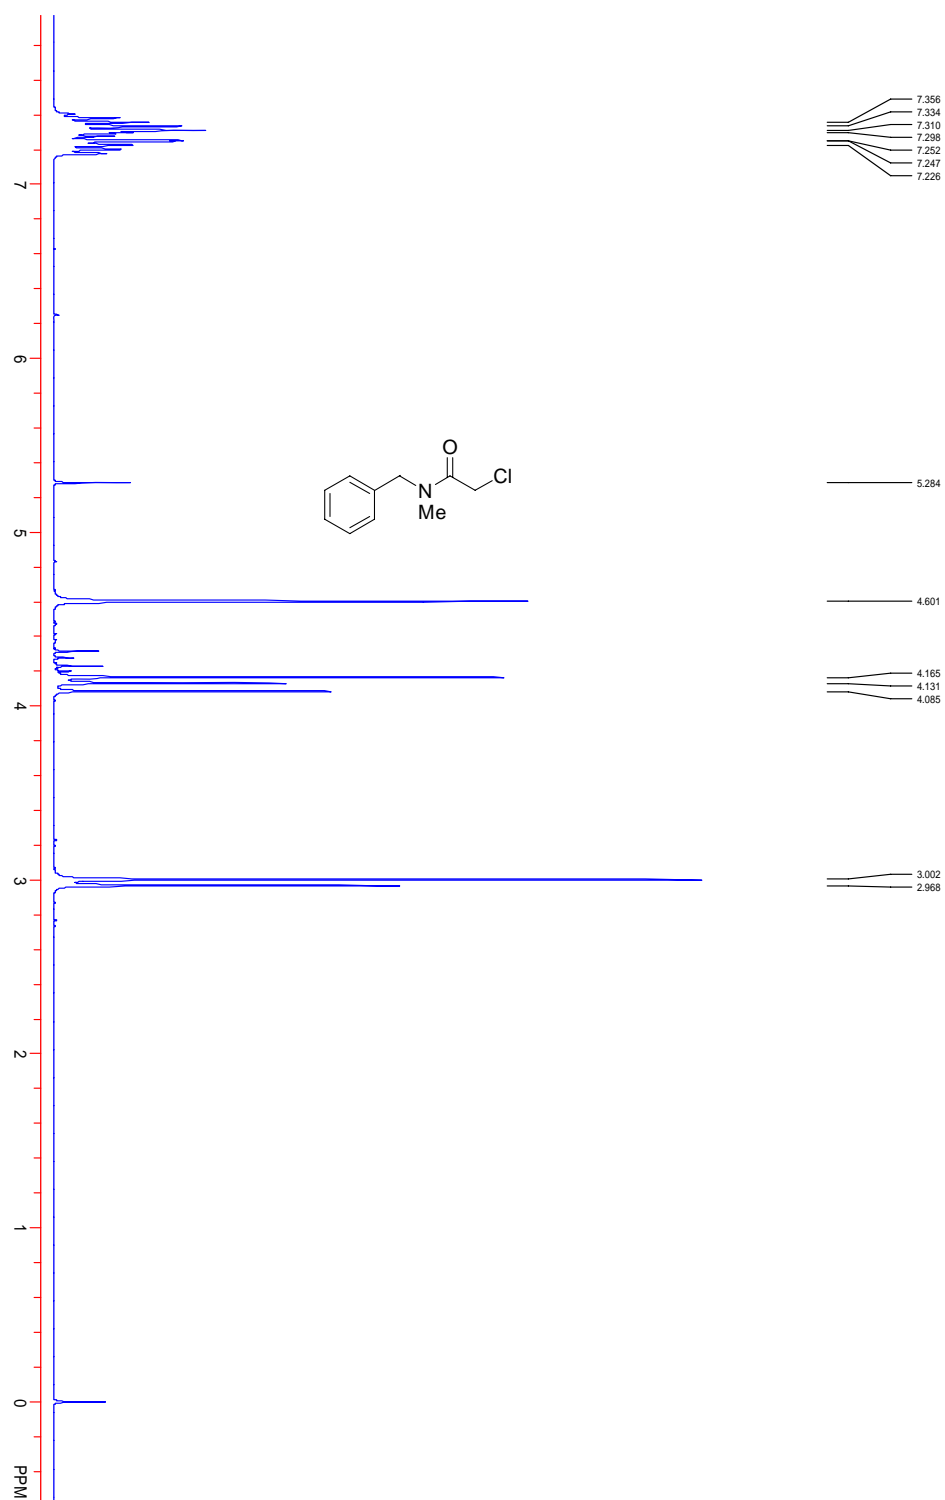

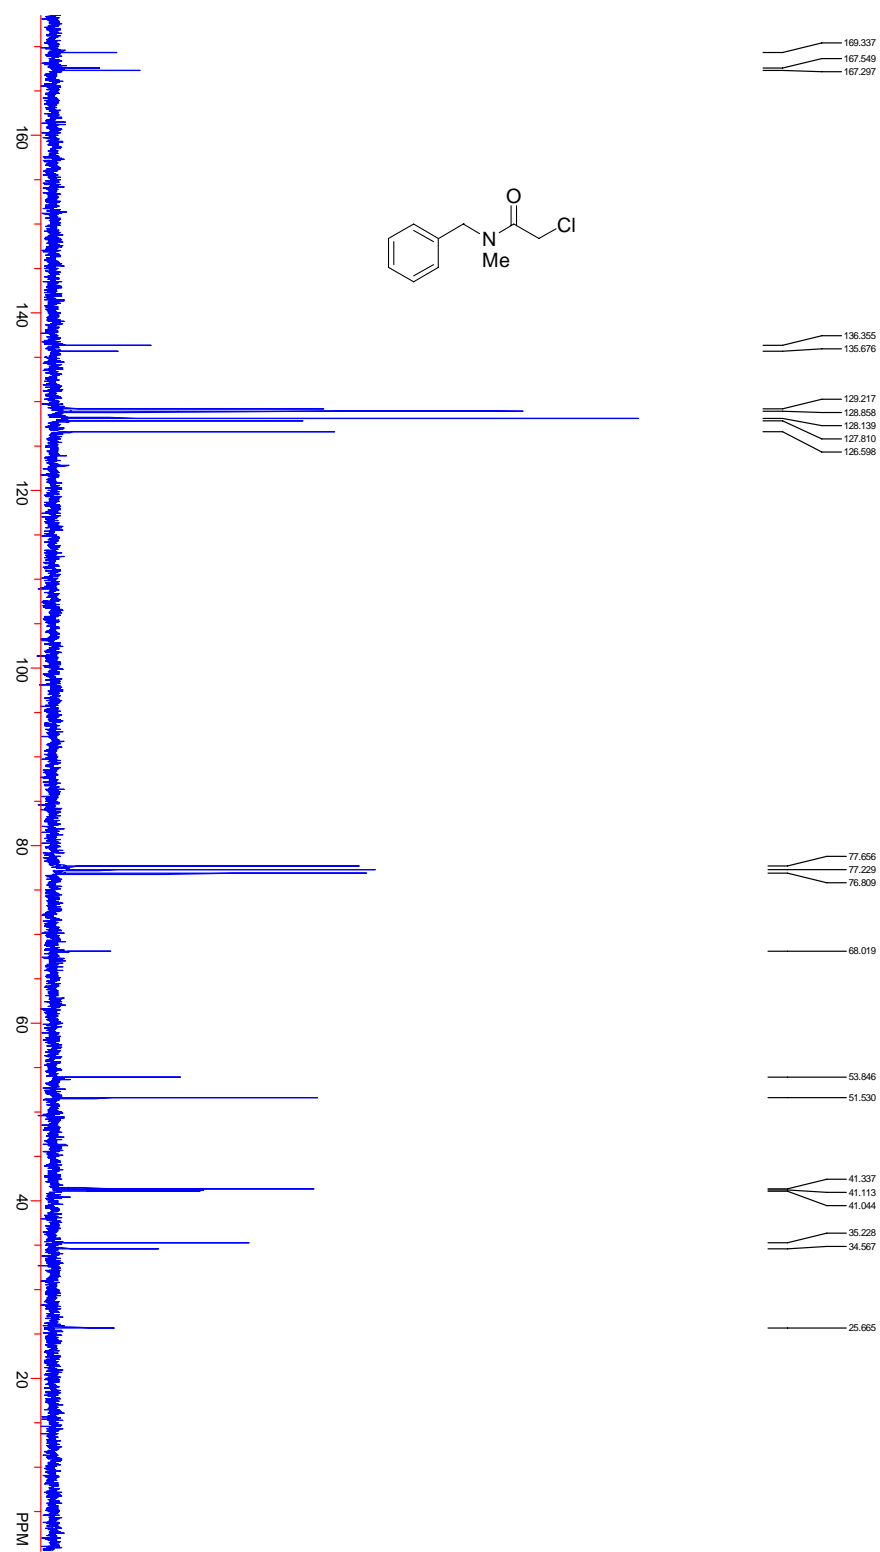



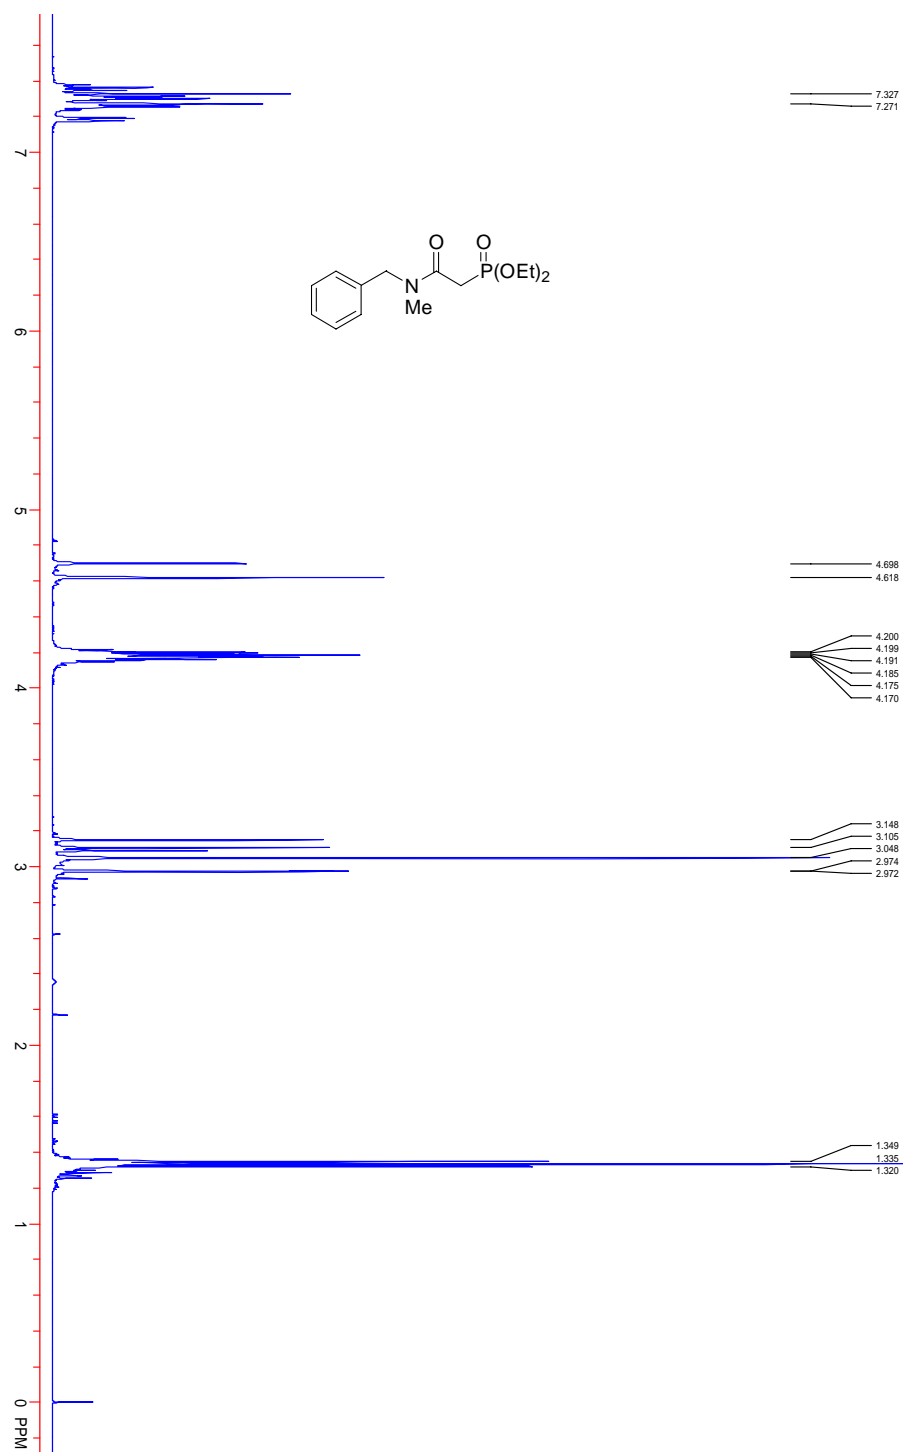

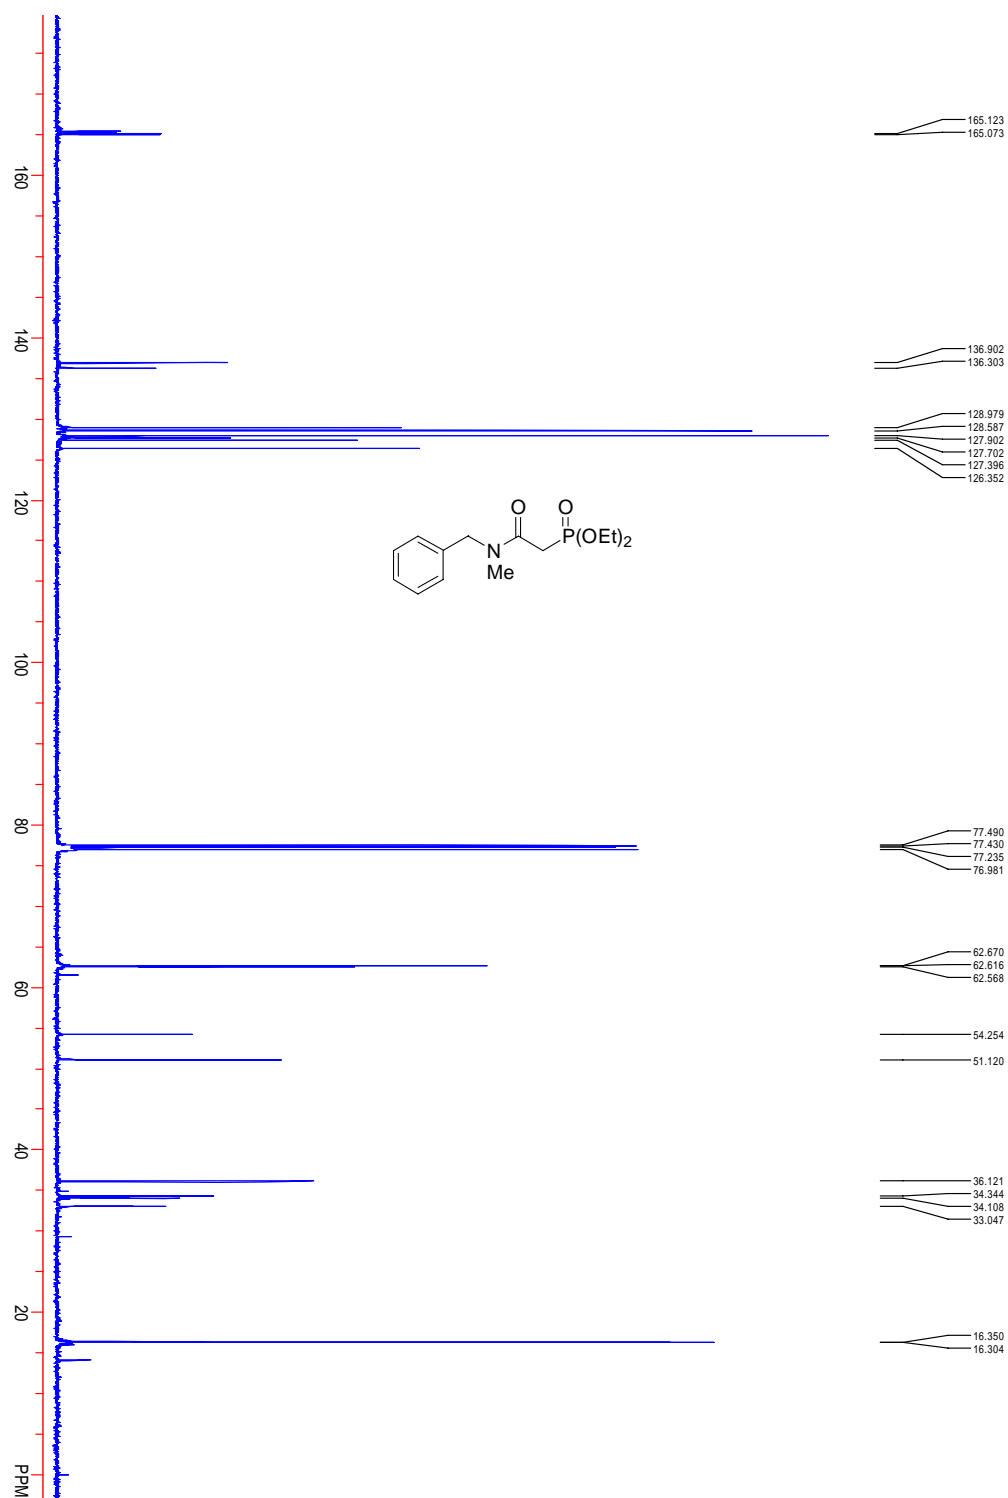

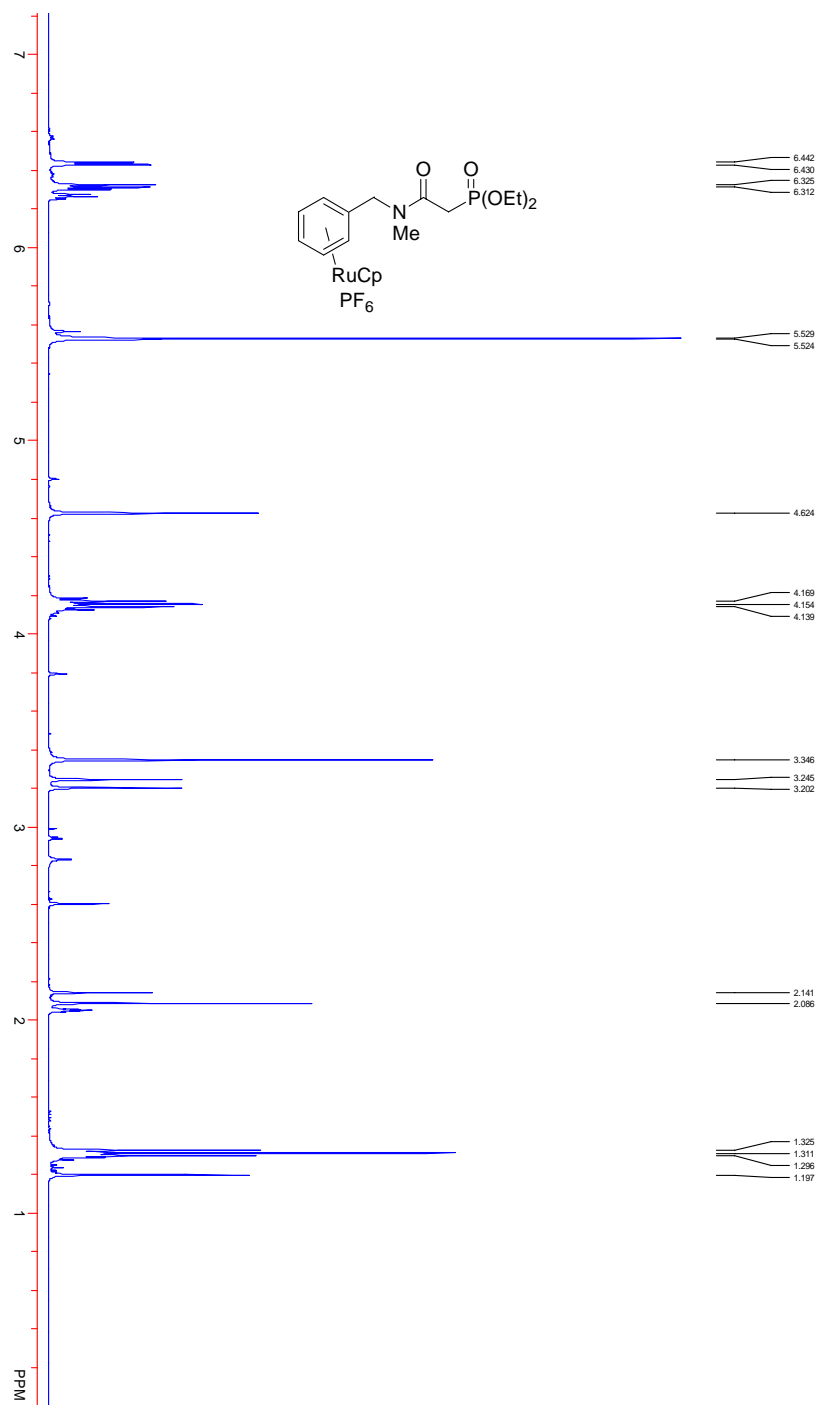

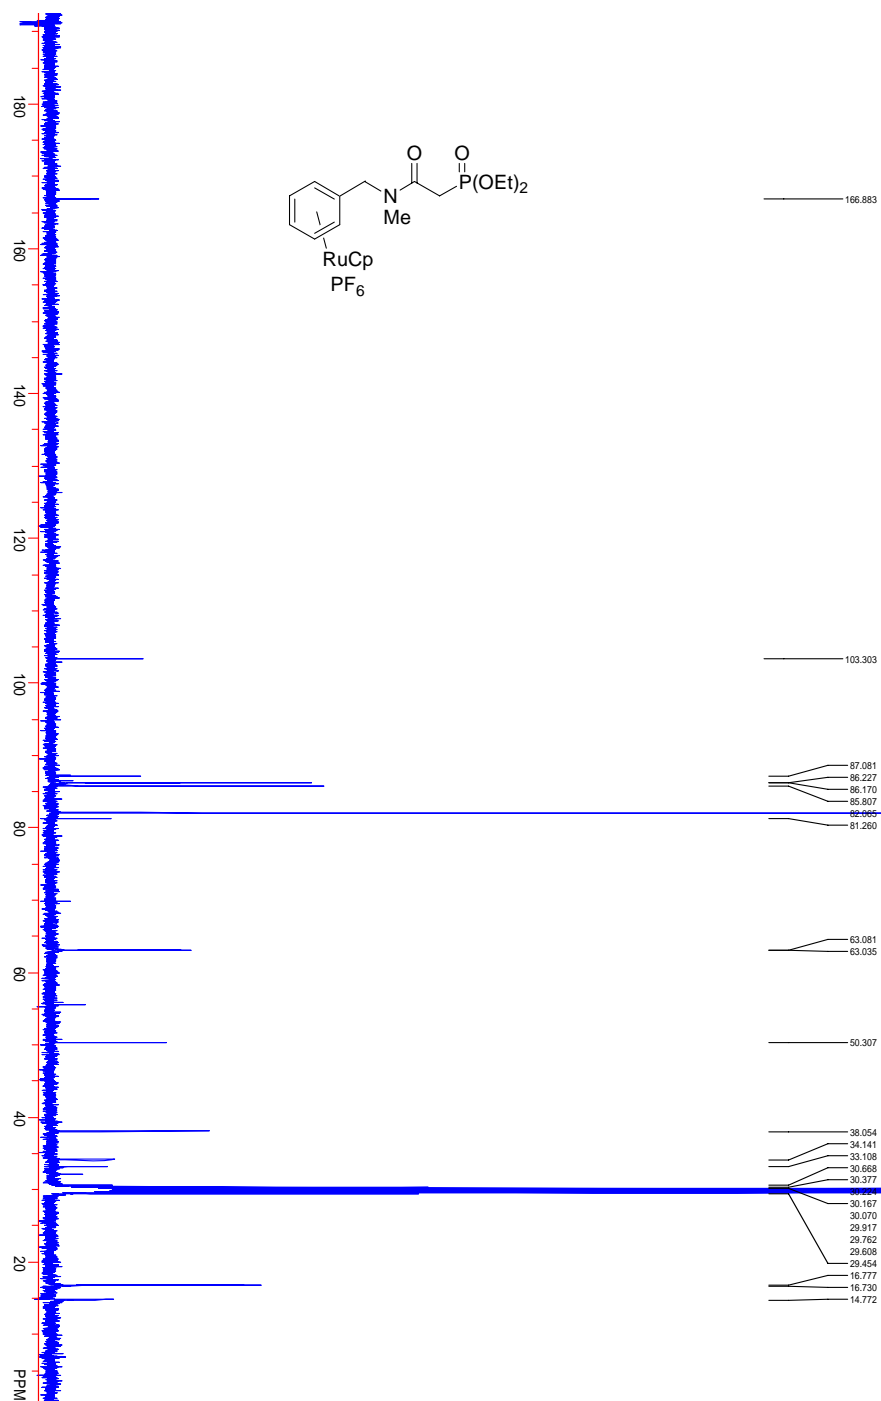

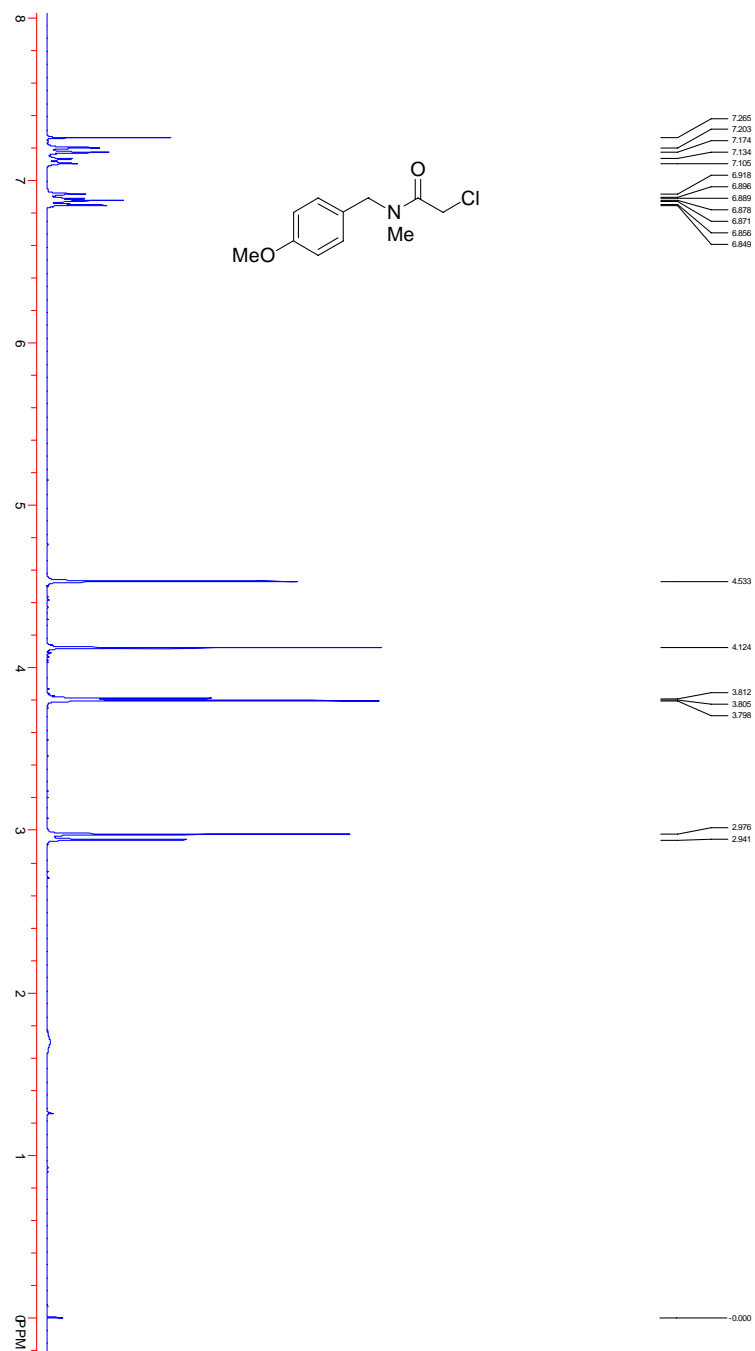

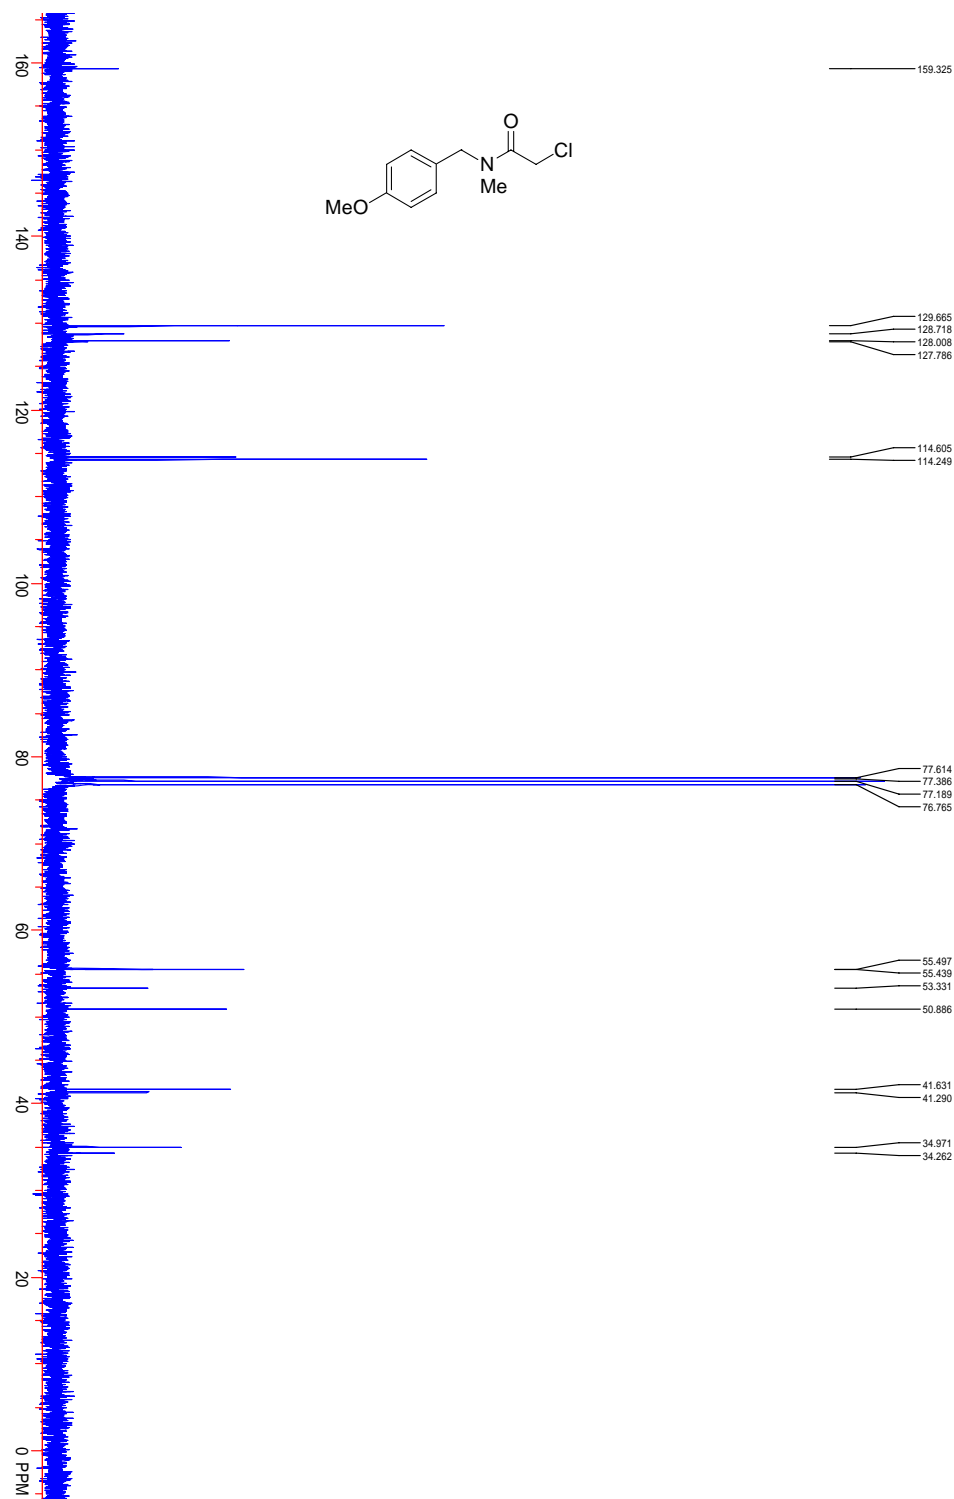

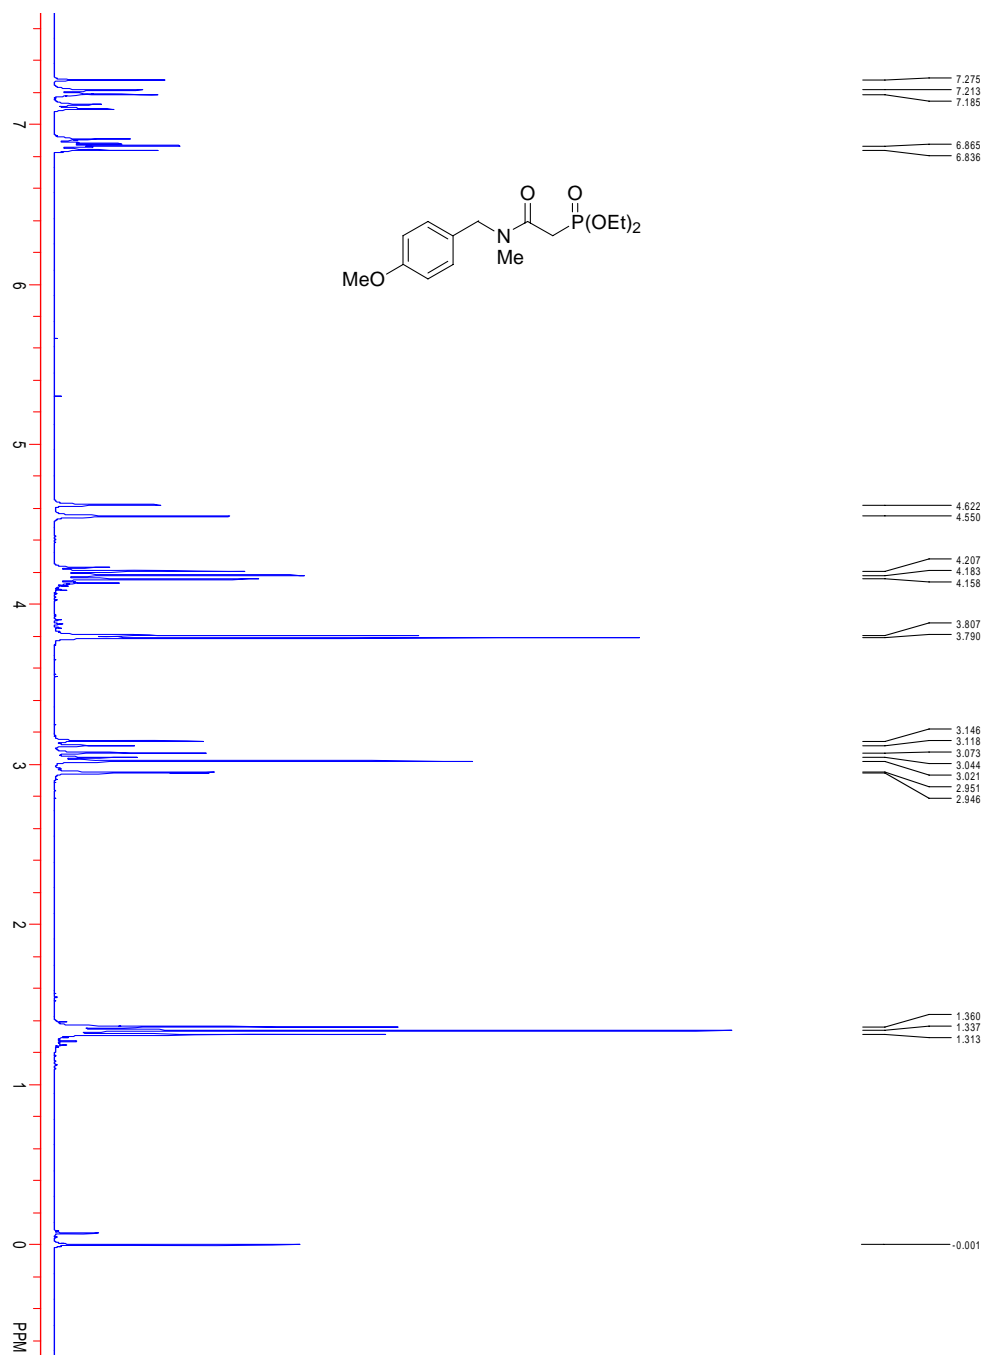

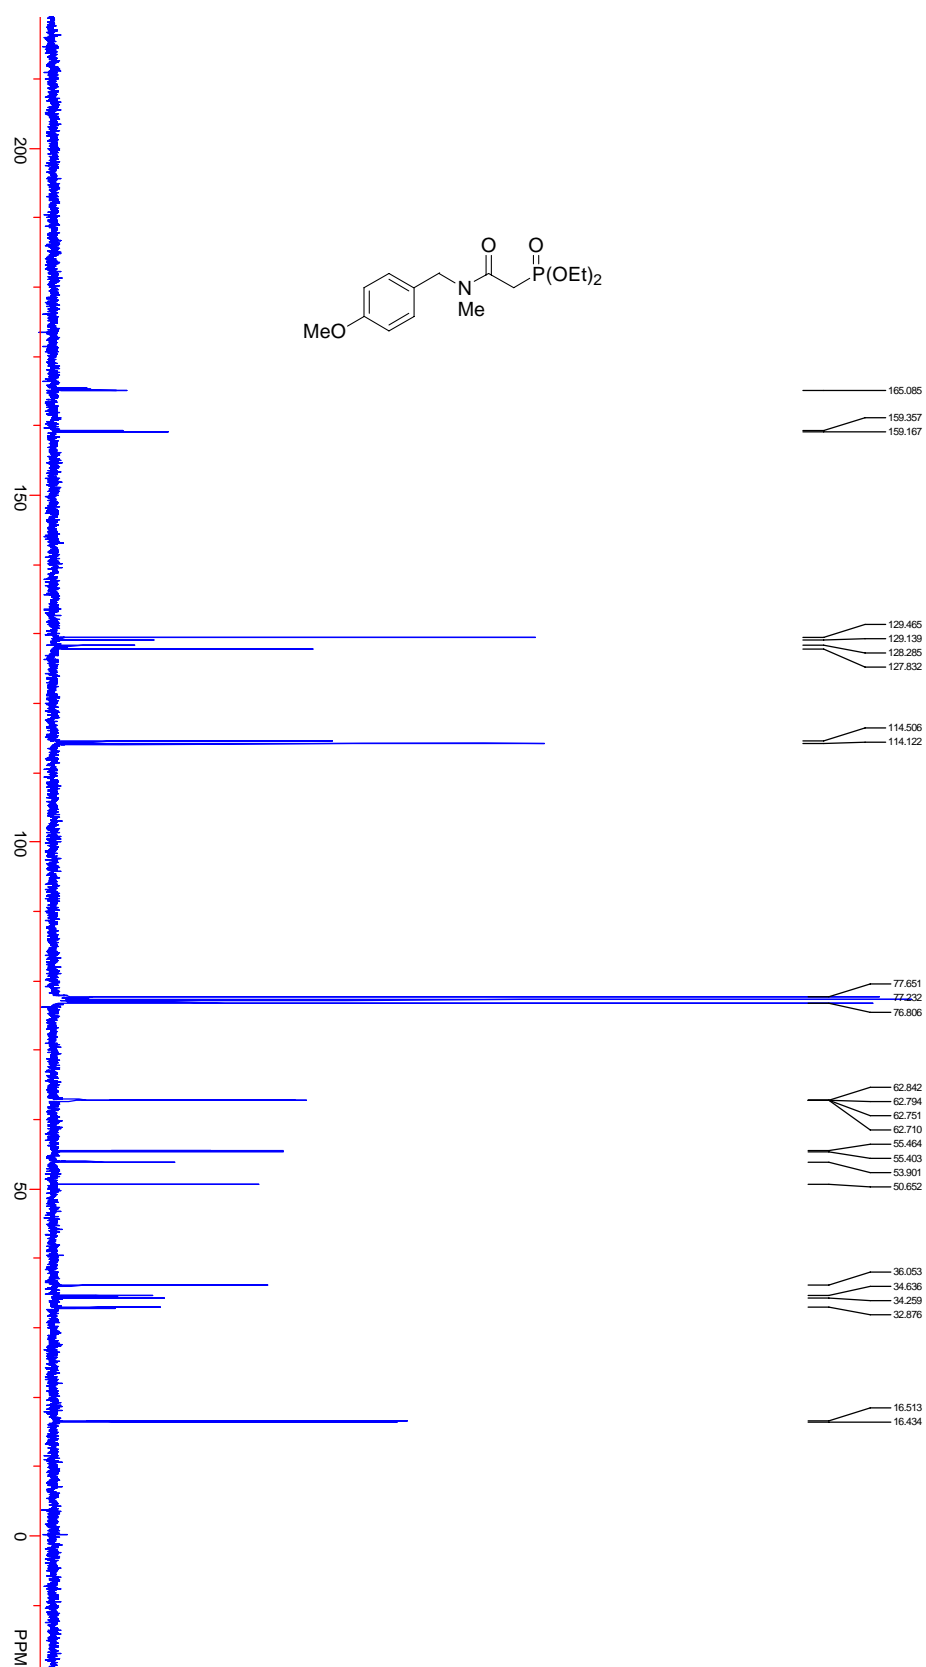



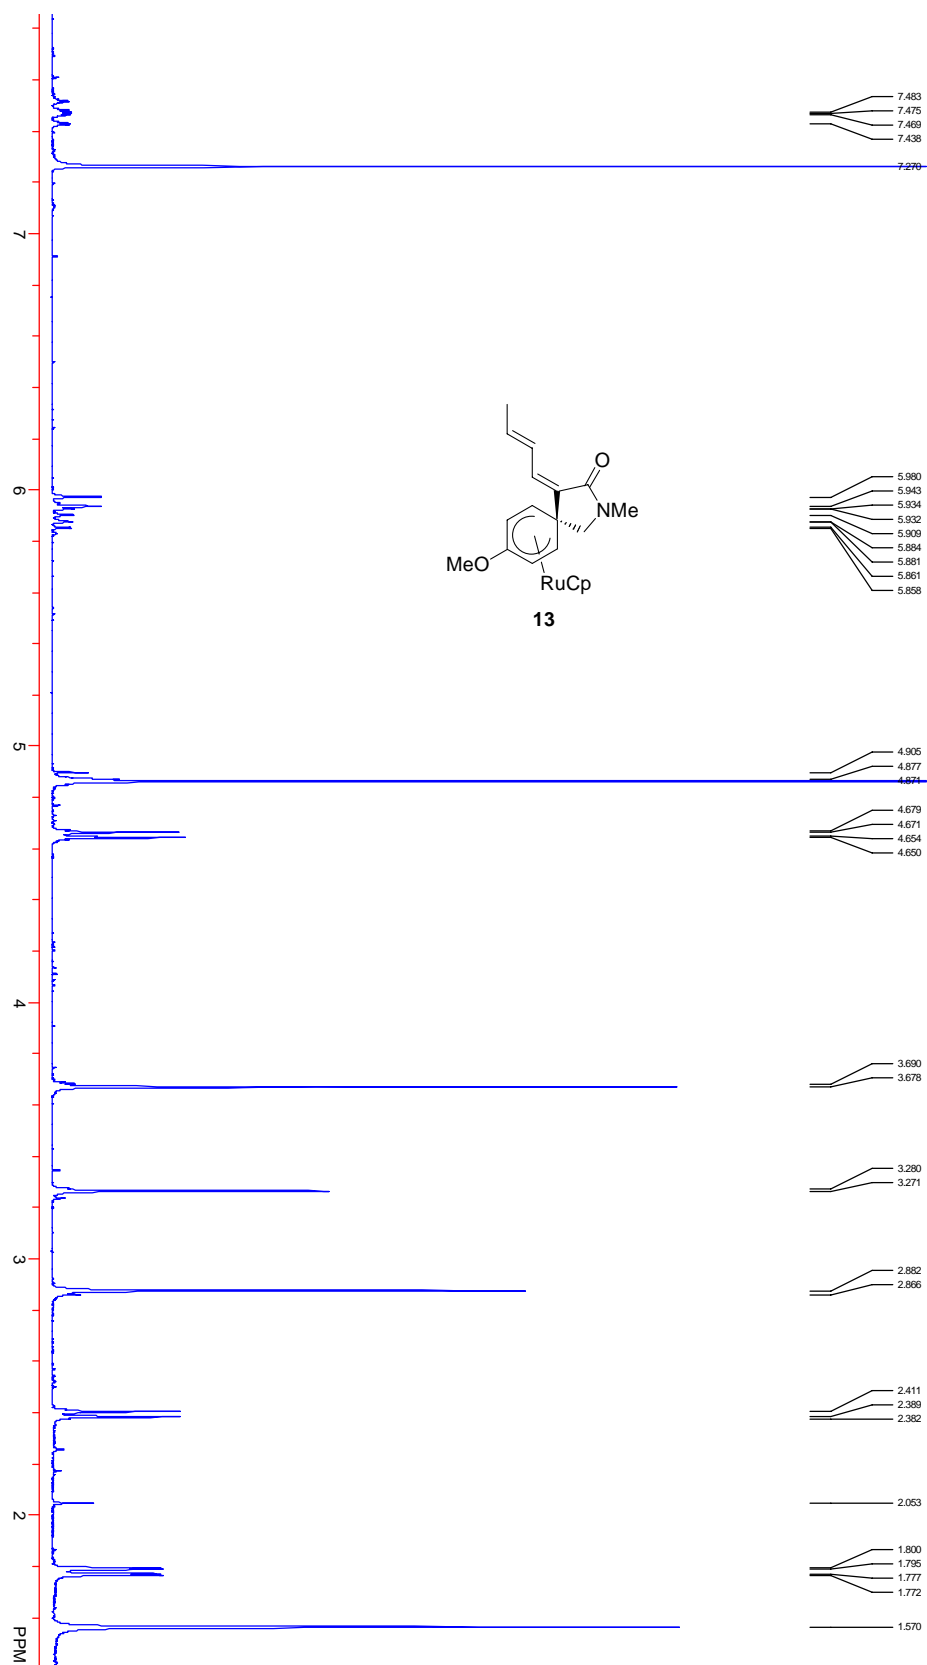

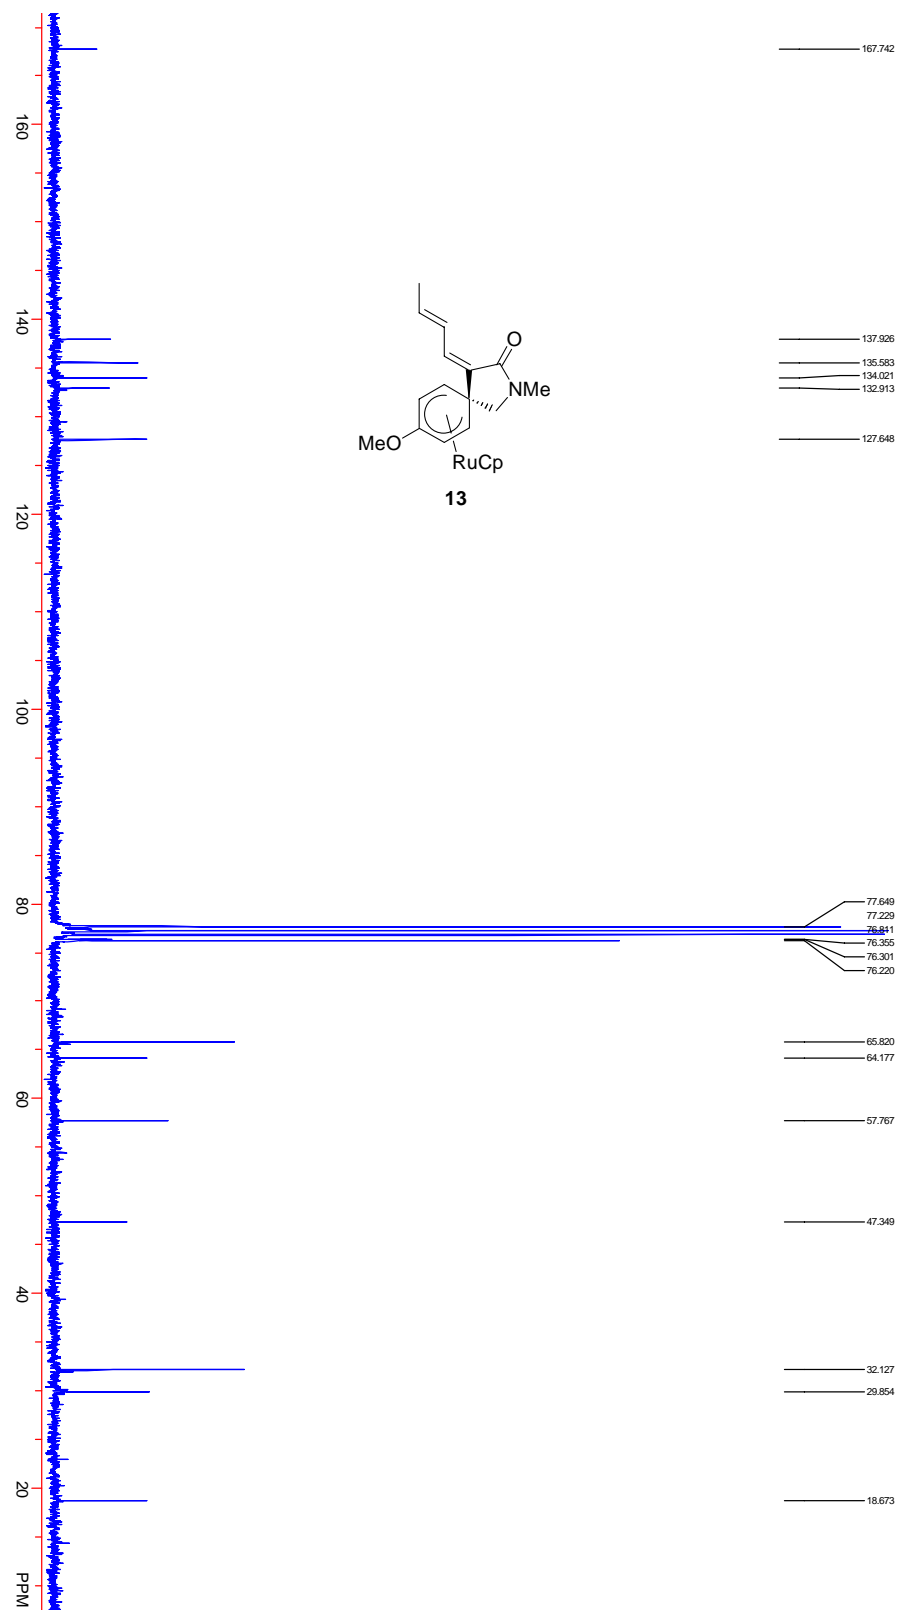

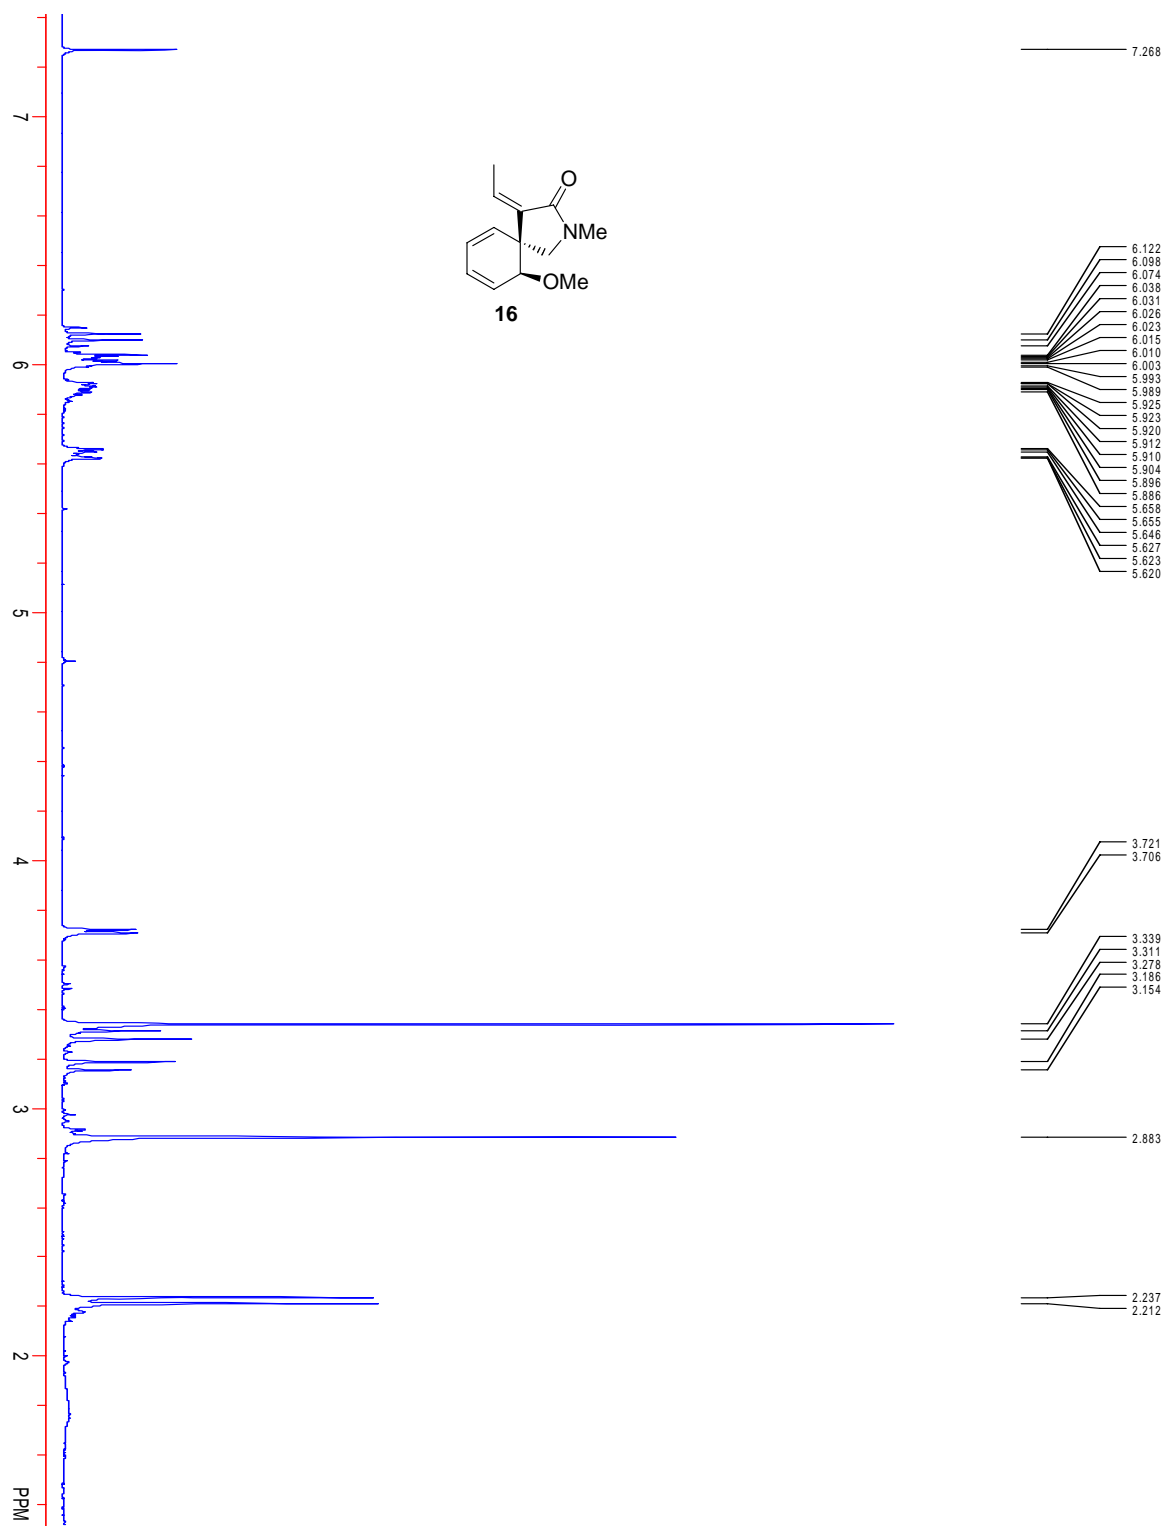

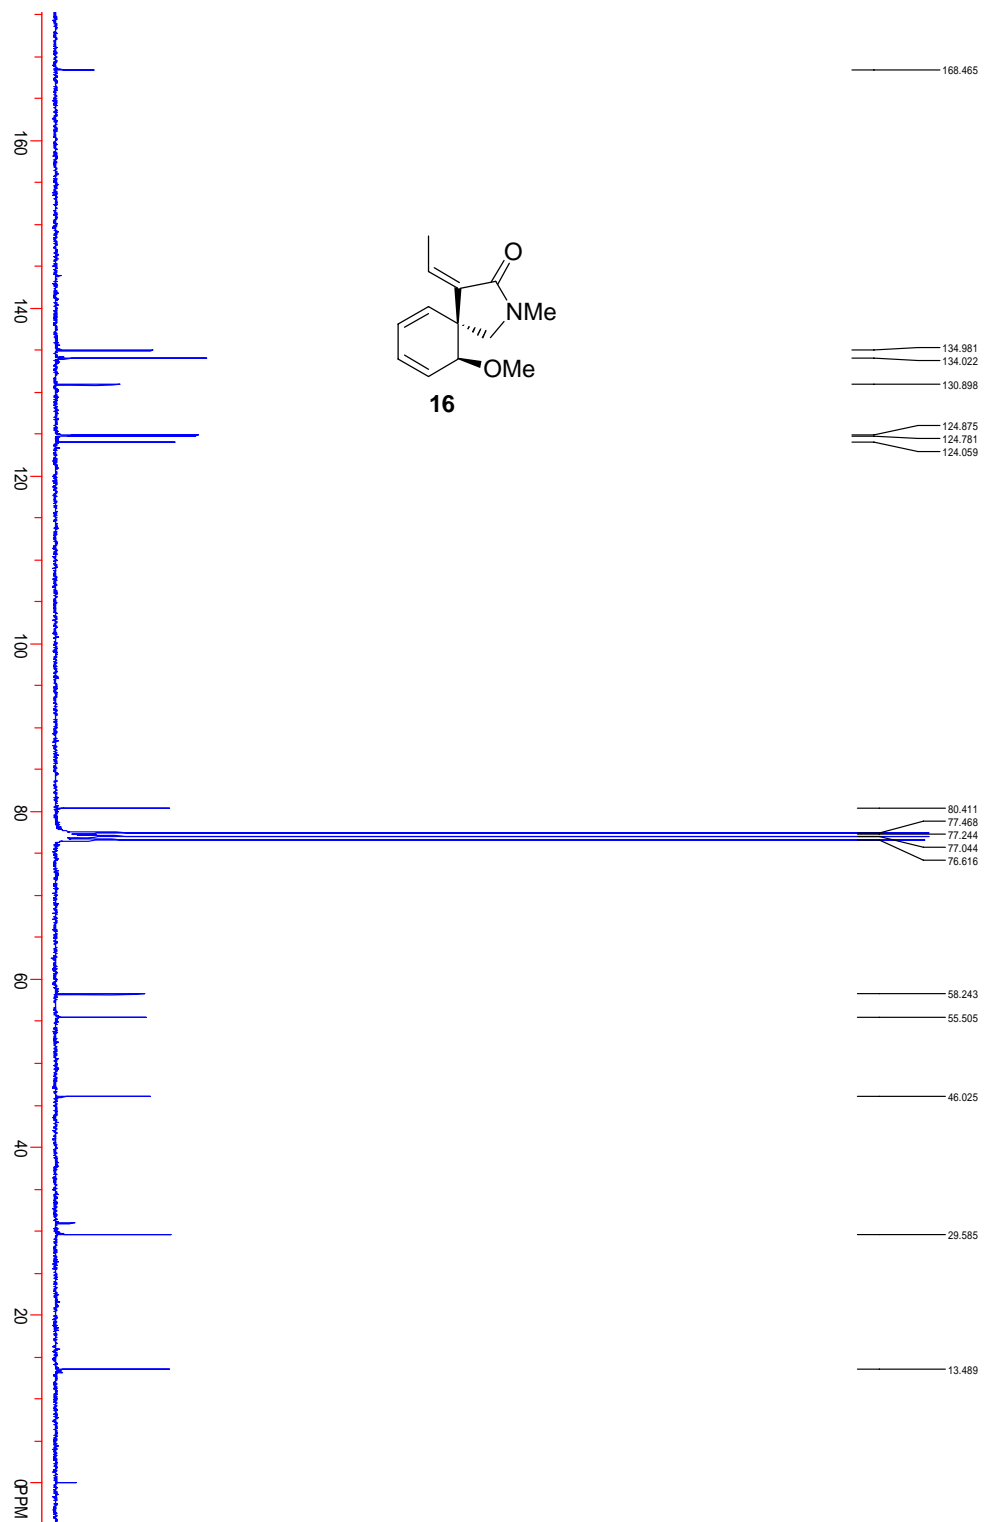

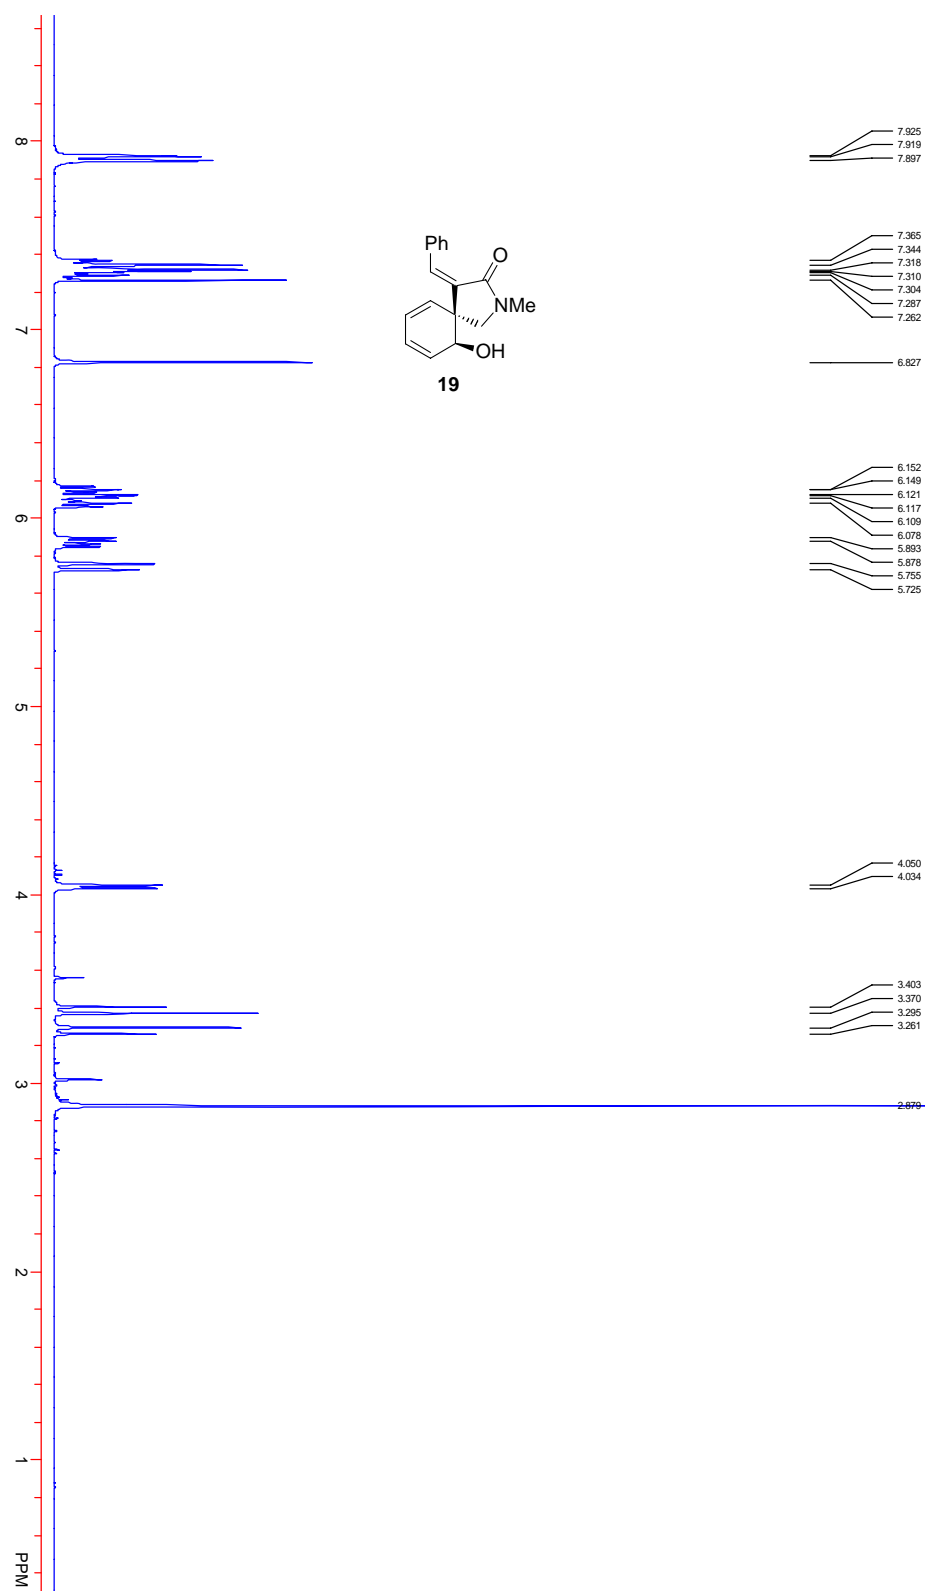

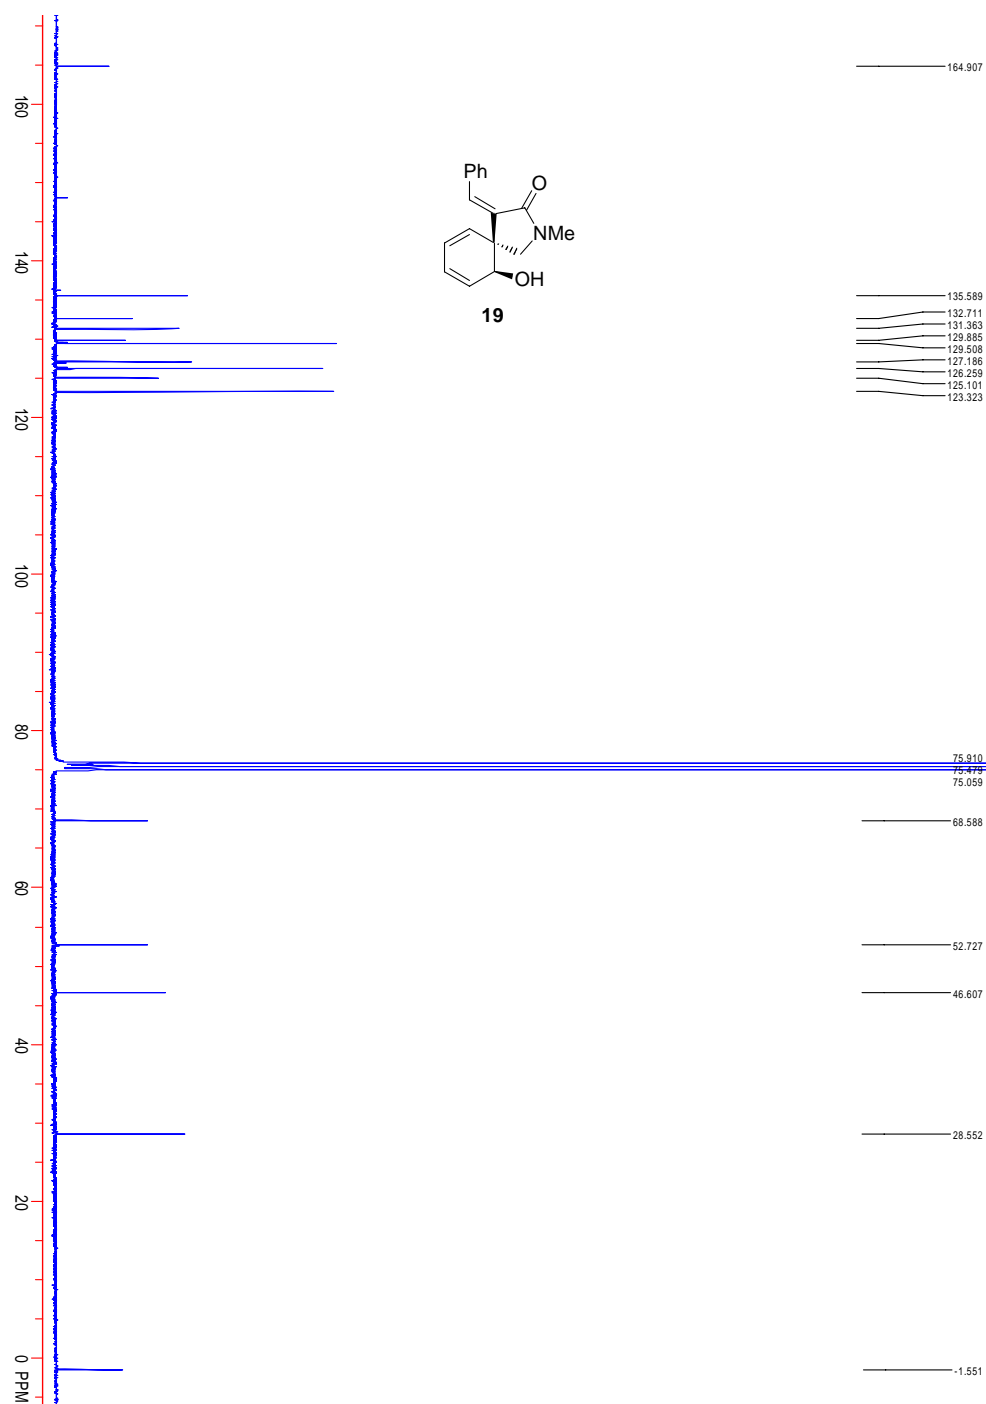

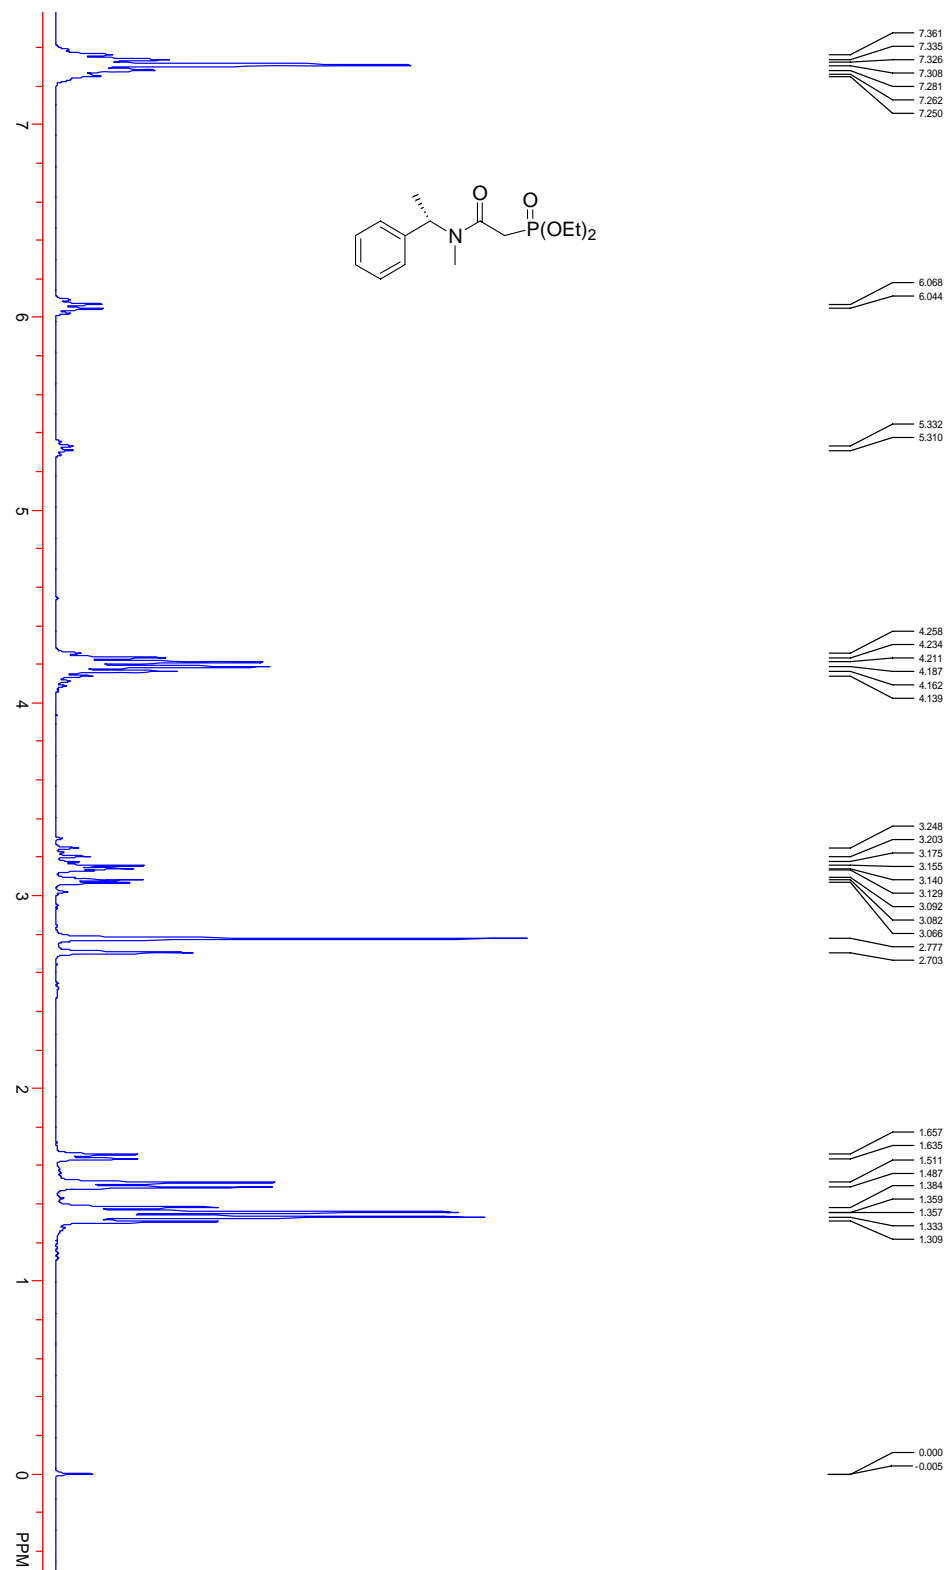

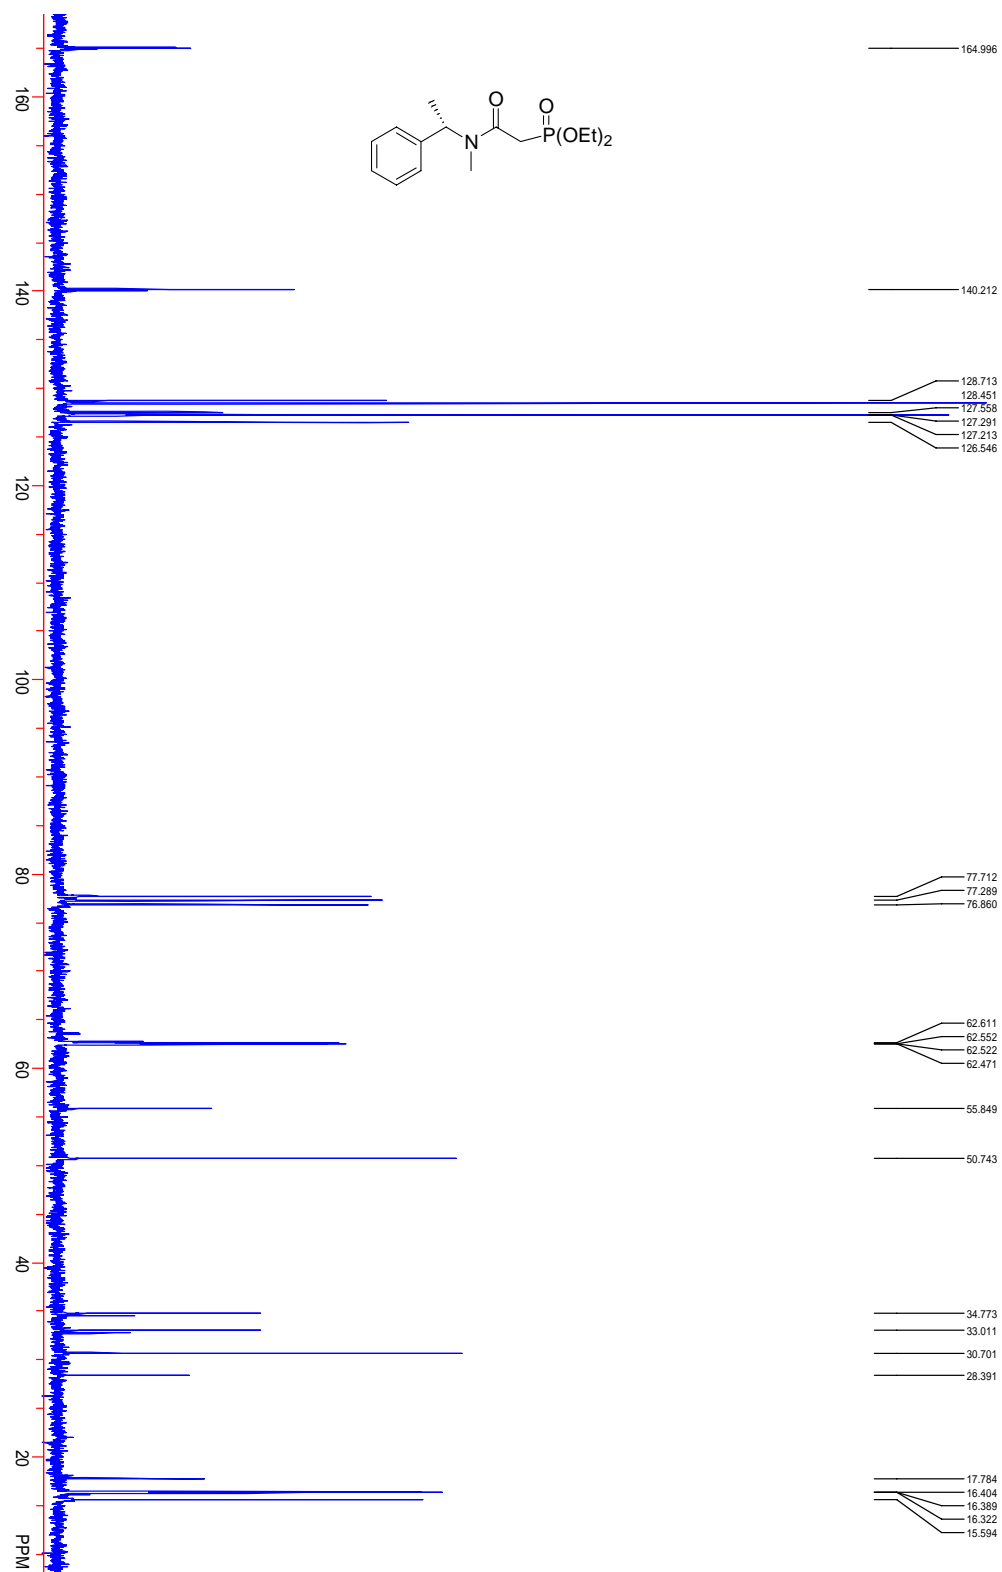



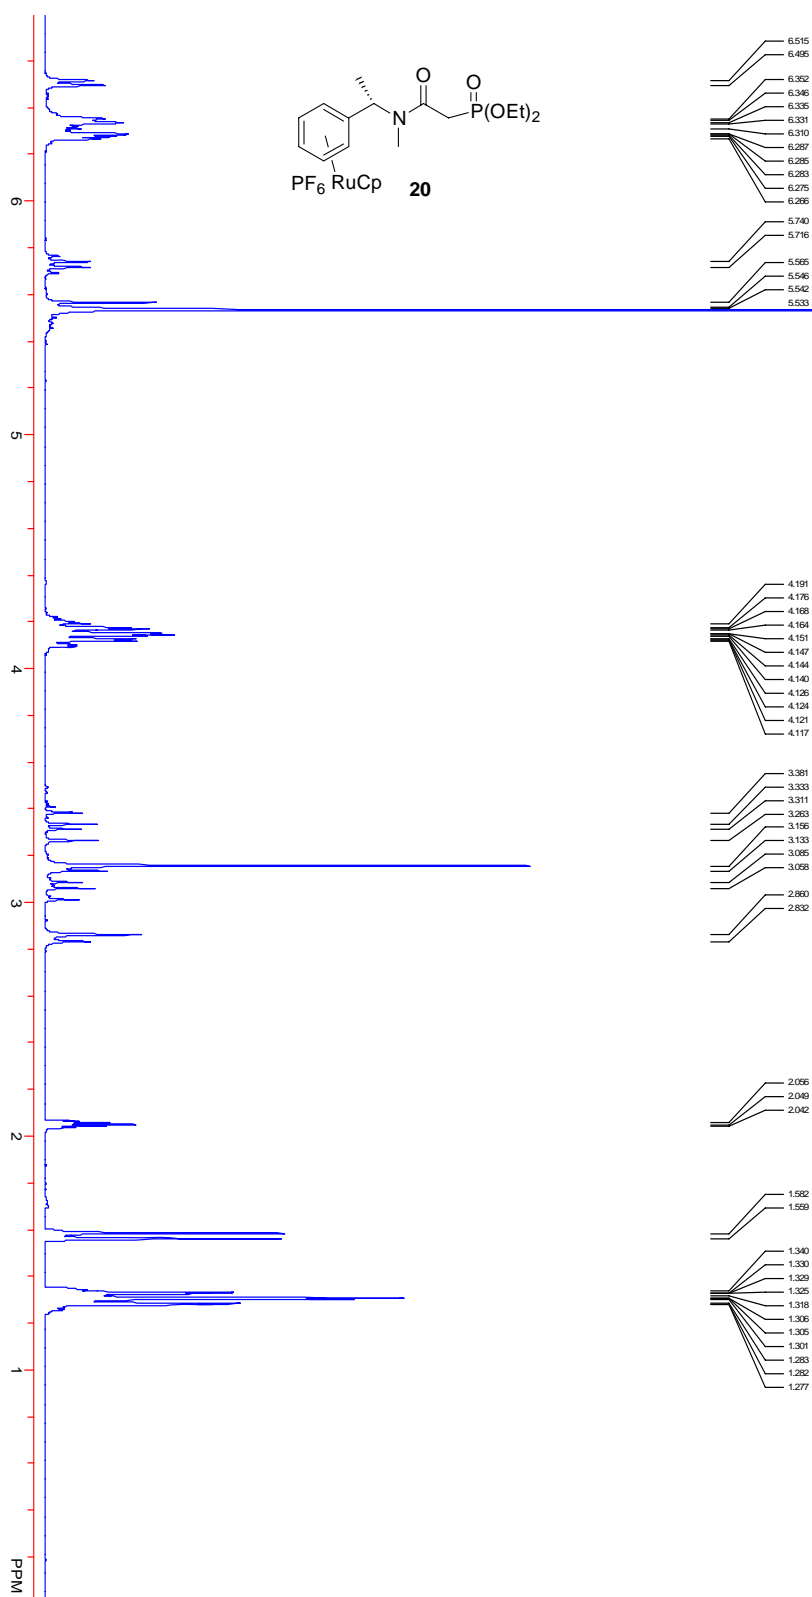

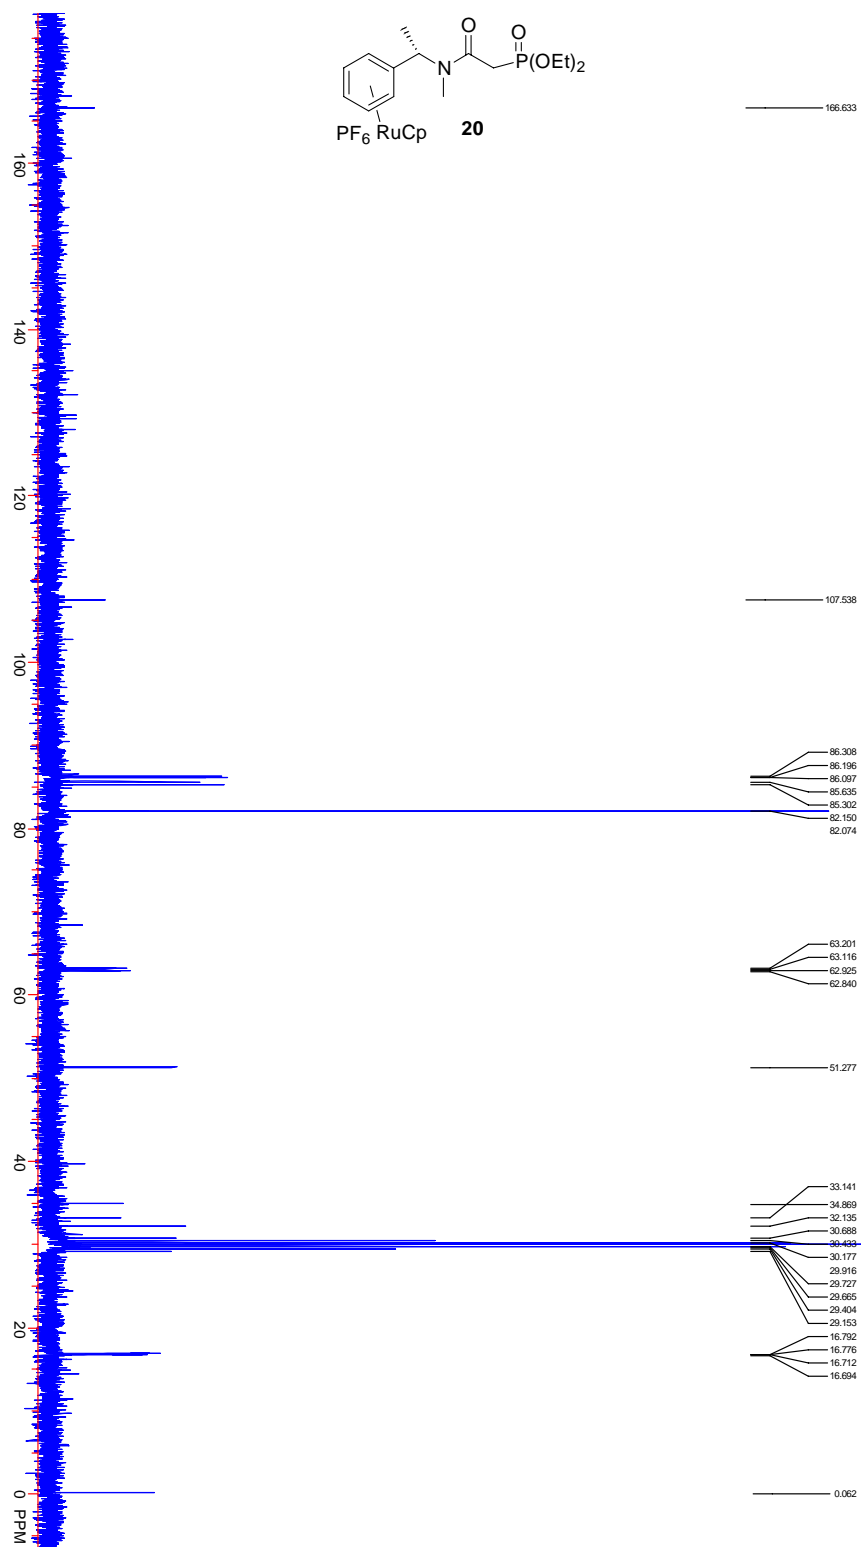

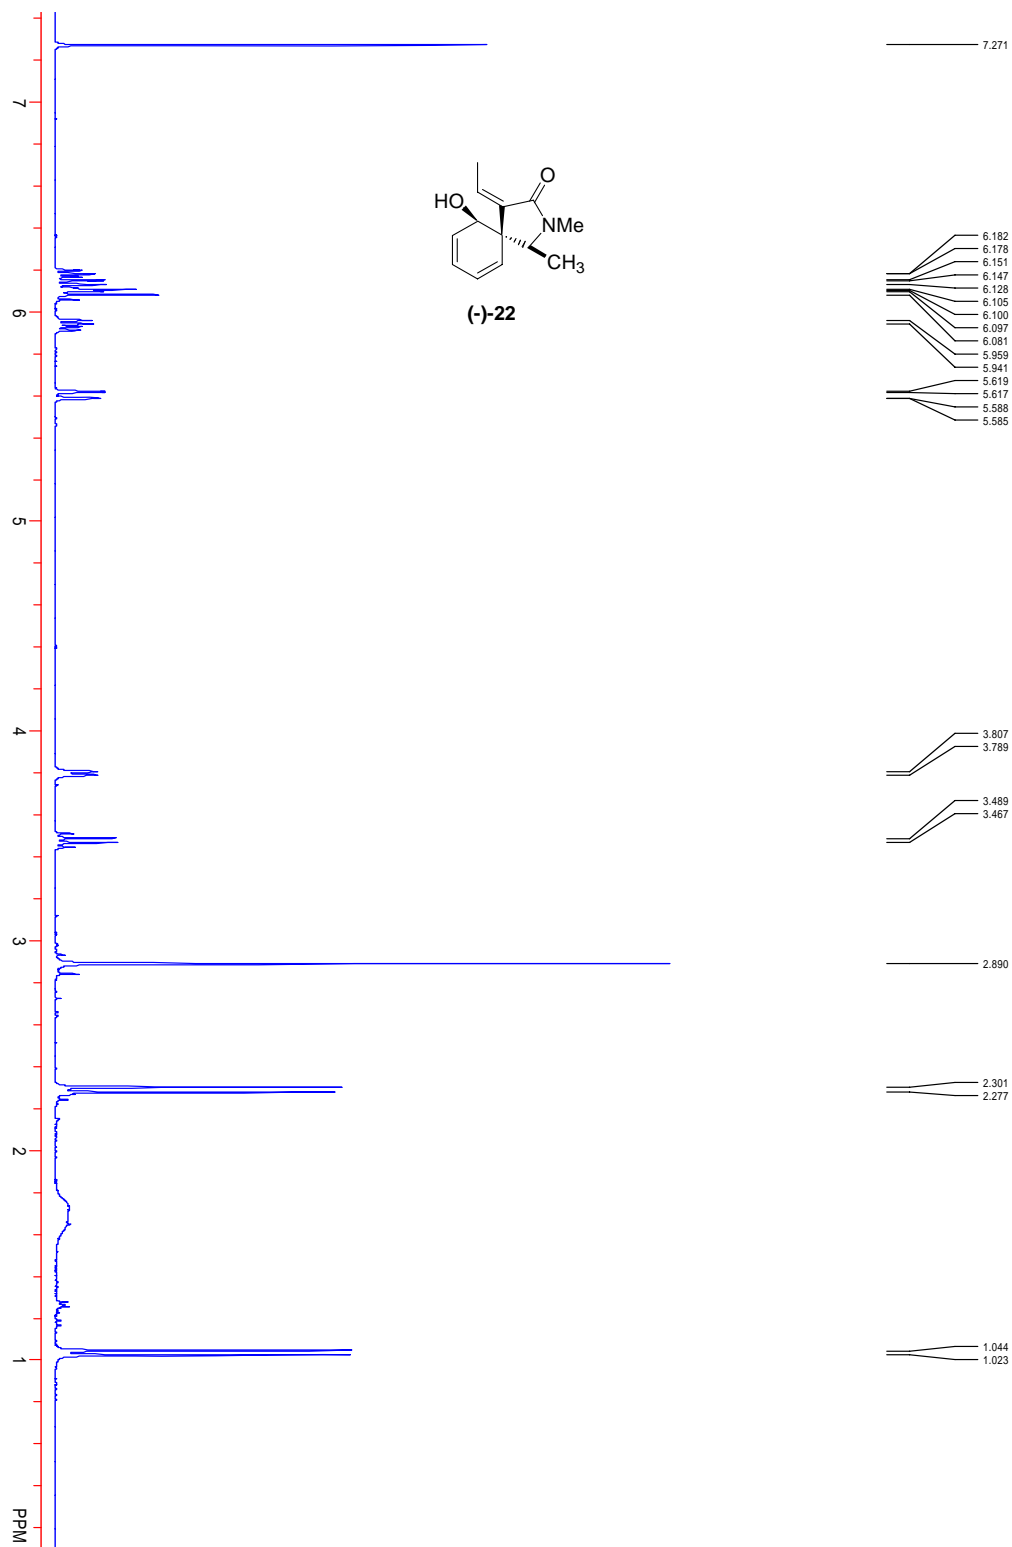

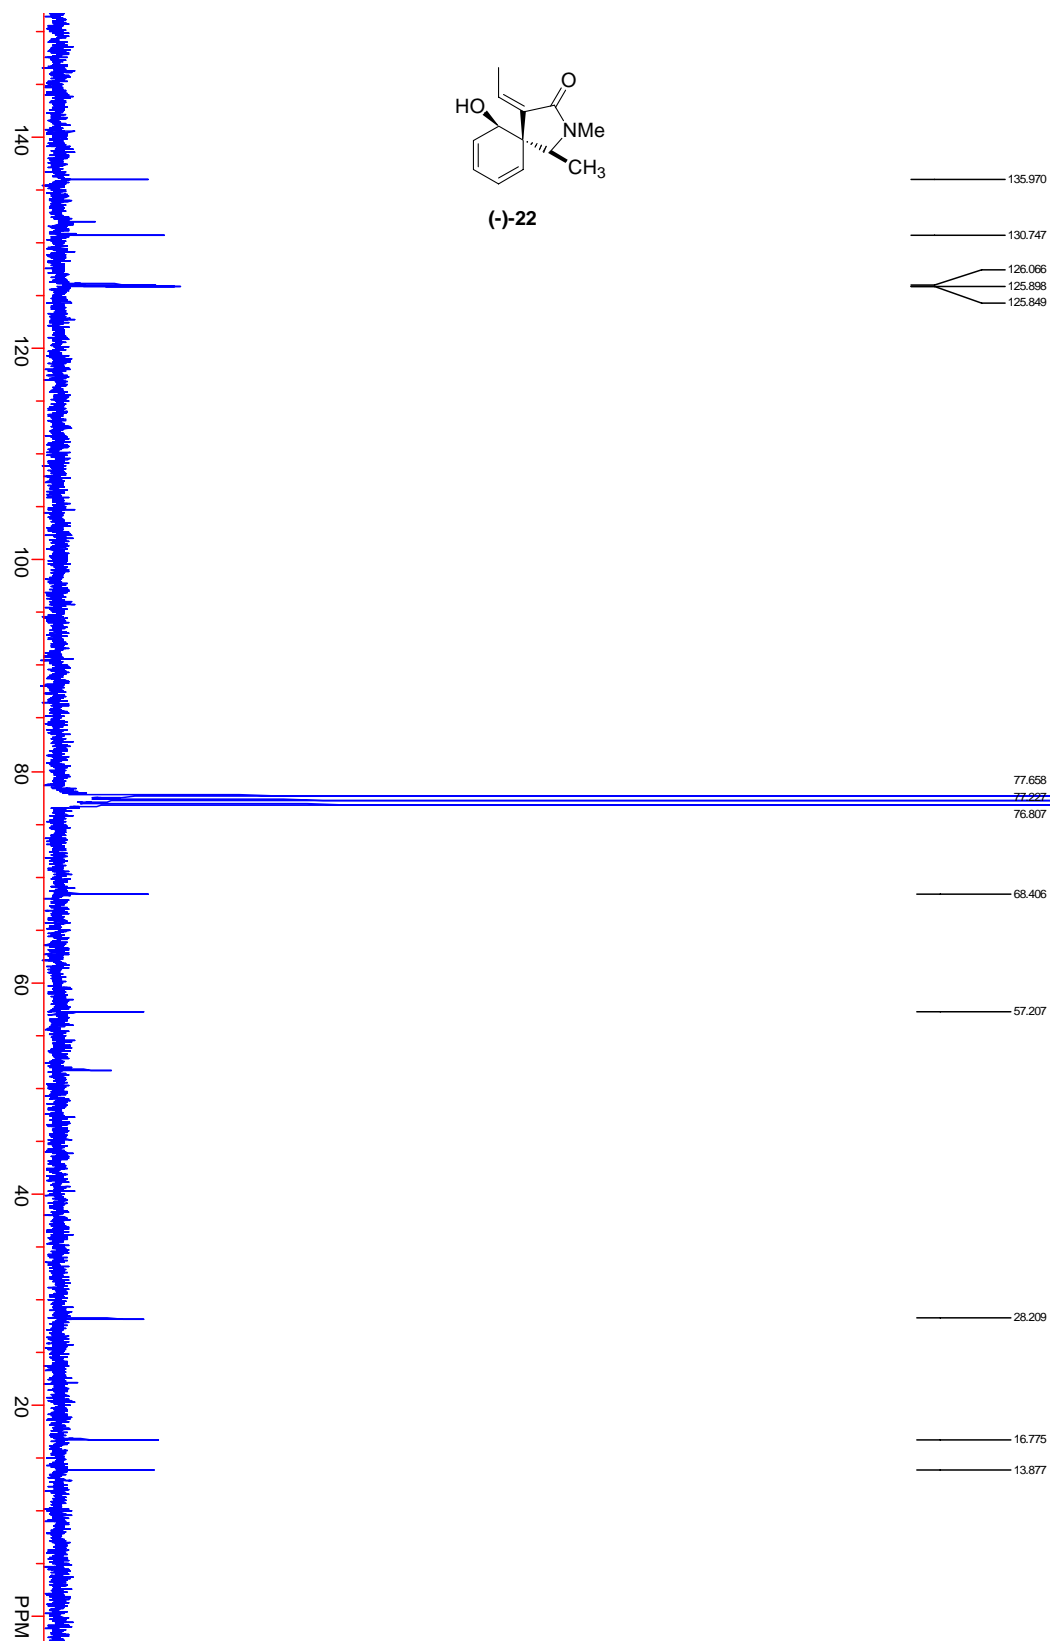

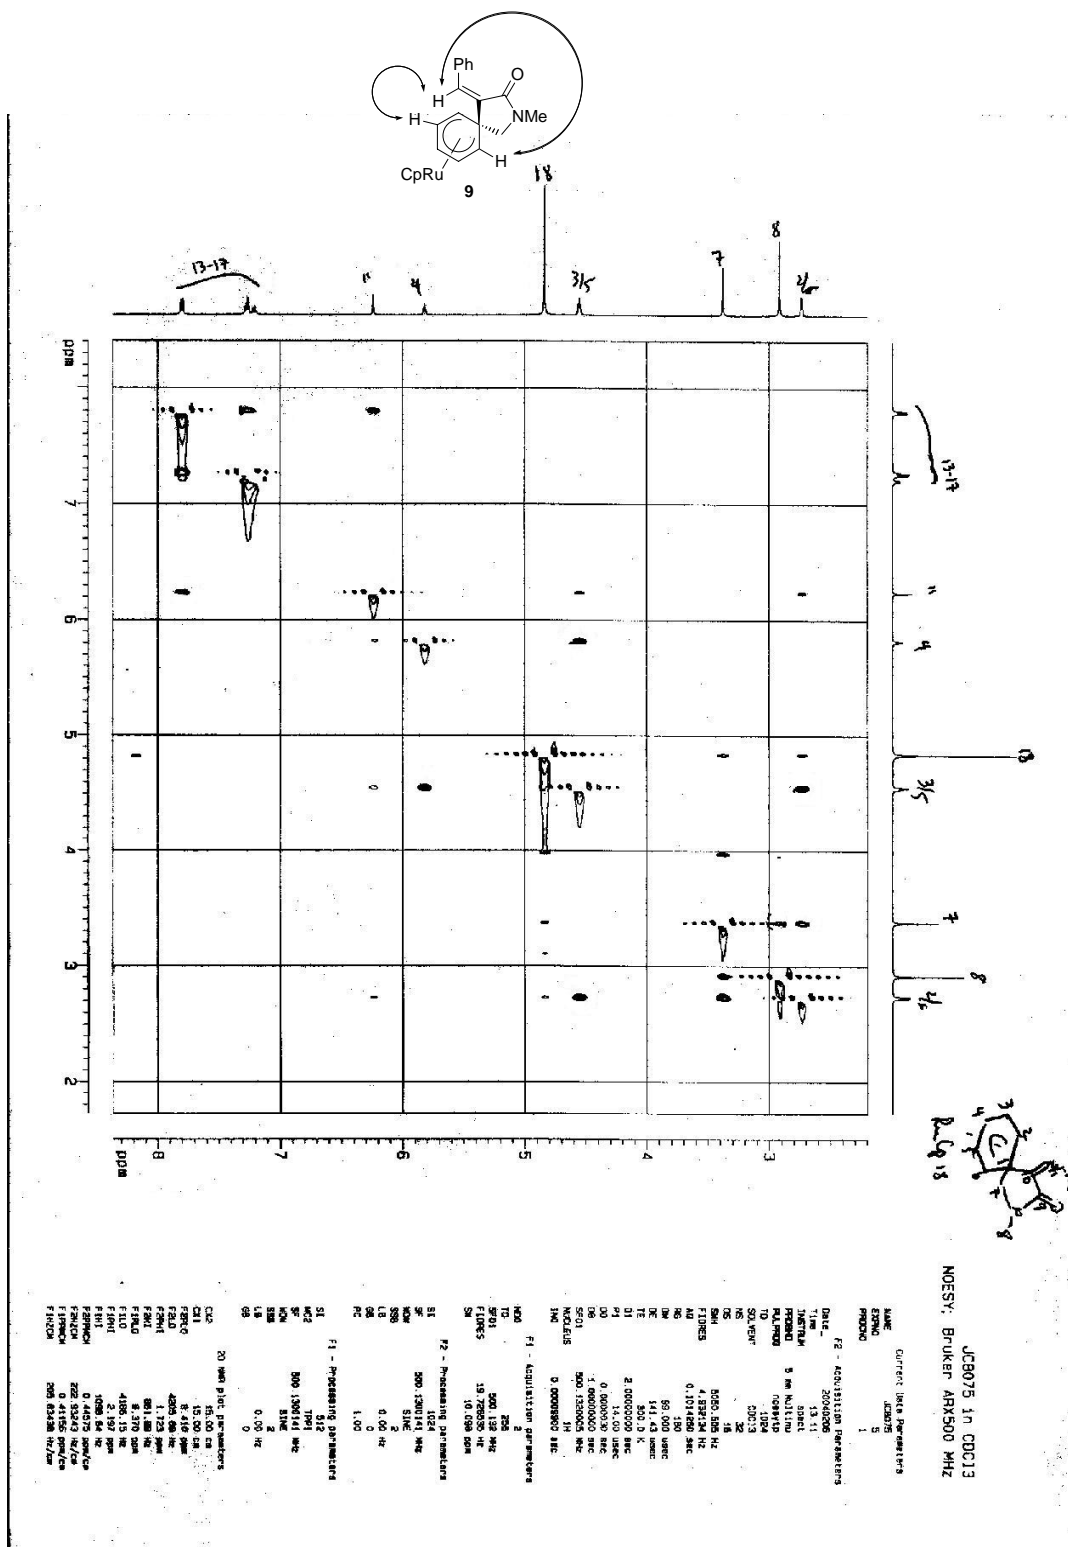

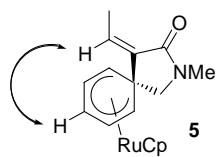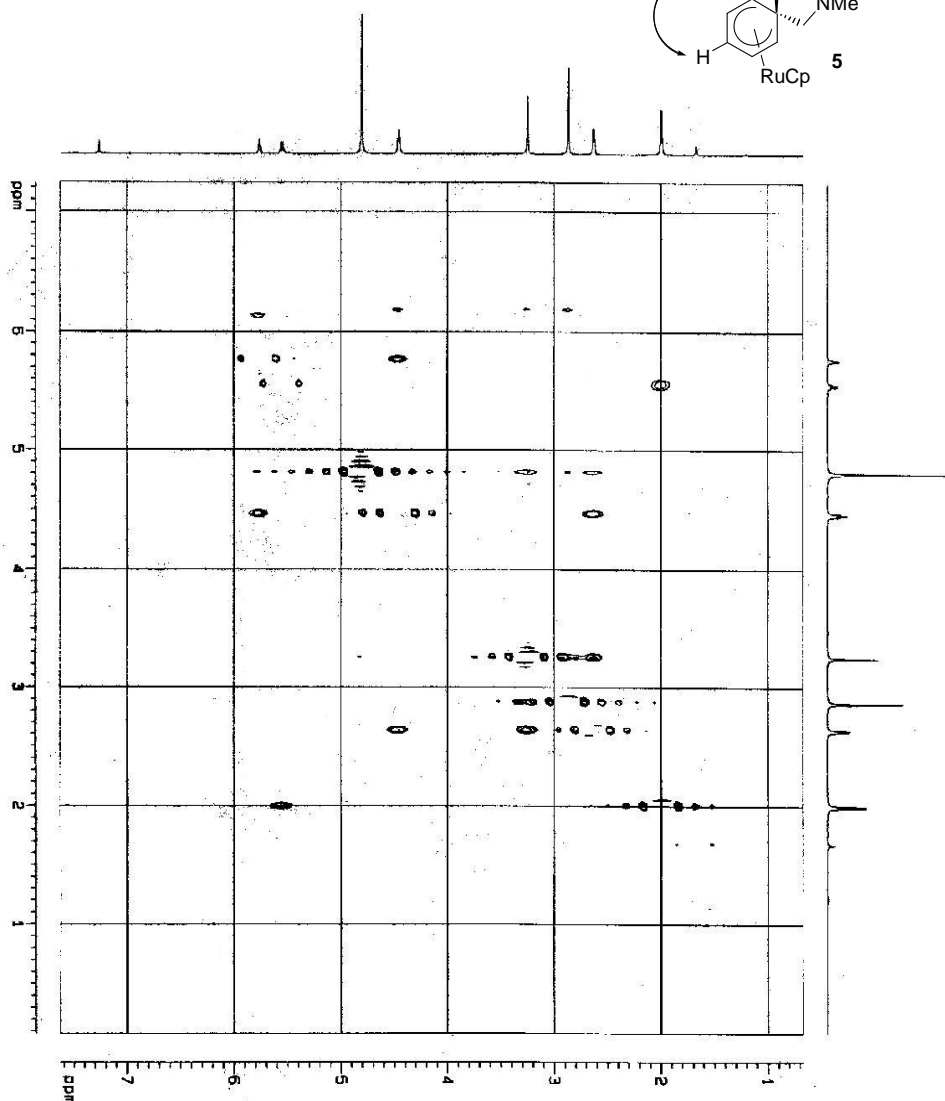

UC8051 F1 in CDCl3  
NOESY: Bruker ARX500 MHz

```
Current Data Parameters
NAME          JC8051
EXPNO         13
```

produced

DATE - ACQUISITION FOR 0001010  
2003:247

| INSTFILM | SPECT  |
|----------|--------|
| 000000   | 000000 |

| Jul 1986 | noesylip |
|----------|----------|
| ID       | 1024     |

| BUYER | DATE |
|-------|------|
| 45    | 32   |

SMH 10636.250 MHz

0.061750 dec

47.000 USOC  
67.34 USOC

2,000,000,000 BNC

0.00000000 0.00000000

500.1330263 442  
SF 01  
MAY 1985

[illegible]

2

SPOT 500.1331 M-1  
ETOPER 40.000125 M-

20.000 000 MS

12 - 17 Octobring per month  
51 1024

MCW SINE

0.00 Hz

1. 2. 3. 4. 5. 6. 7. 8. 9. 10. 11. 12. 13. 14. 15. 16. 17. 18. 19. 20. 21. 22. 23. 24. 25. 26. 27. 28. 29. 30. 31. 32. 33. 34. 35. 36. 37. 38. 39. 40. 41. 42. 43. 44. 45. 46. 47. 48. 49. 50. 51. 52. 53. 54. 55. 56. 57. 58. 59. 60. 61. 62. 63. 64. 65. 66. 67. 68. 69. 70. 71. 72. 73. 74. 75. 76. 77. 78. 79. 80. 81. 82. 83. 84. 85. 86. 87. 88. 89. 90. 91. 92. 93. 94. 95. 96. 97. 98. 99. 100. 101. 102. 103. 104. 105. 106. 107. 108. 109. 110. 111. 112. 113. 114. 115. 116. 117. 118. 119. 120. 121. 122. 123. 124. 125. 126. 127. 128. 129. 130. 131. 132. 133. 134. 135. 136. 137. 138. 139. 140. 141. 142. 143. 144. 145. 146. 147. 148. 149. 150. 151. 152. 153. 154. 155. 156. 157. 158. 159. 160. 161. 162. 163. 164. 165. 166. 167. 168. 169. 170. 171. 172. 173. 174. 175. 176. 177. 178. 179. 180. 181. 182. 183. 184. 185. 186. 187. 188. 189. 190. 191. 192. 193. 194. 195. 196. 197. 198. 199. 200. 201. 202. 203. 204. 205. 206. 207. 208. 209. 210. 211. 212. 213. 214. 215. 216. 217. 218. 219. 220. 221. 222. 223. 224. 225. 226. 227. 228. 229. 230. 231. 232. 233. 234. 235. 236. 237. 238. 239. 240. 241. 242. 243. 244. 245. 246. 247. 248. 249. 250. 251. 252. 253. 254. 255. 256. 257. 258. 259. 260. 261. 262. 263. 264. 265. 266. 267. 268. 269. 270. 271. 272. 273. 274. 275. 276. 277. 278. 279. 280. 281. 282. 283. 284. 285. 286. 287. 288. 289. 290. 291. 292. 293. 294. 295. 296. 297. 298. 299. 300. 301. 302. 303. 304. 305. 306. 307. 308. 309. 310. 311. 312. 313. 314. 315. 316. 317. 318. 319. 320. 321. 322. 323. 324. 325. 326. 327. 328. 329. 330. 331. 332. 333. 334. 335. 336. 337. 338. 339. 340. 341. 342. 343. 344. 345. 346. 347. 348. 349. 350. 351. 352. 353. 354. 355. 356. 357. 358. 359. 360. 361. 362. 363. 364. 365. 366. 367. 368. 369. 370. 371. 372. 373. 374. 375. 376. 377. 378. 379. 380. 381. 382. 383. 384. 385. 386. 387. 388. 389. 390. 391. 392. 393. 394. 395. 396. 397. 398. 399. 400. 401. 402. 403. 404. 405. 406. 407. 408. 409. 410. 411. 412. 413. 414. 415. 416. 417. 418. 419. 420. 421. 422. 423. 424. 425. 426. 427. 428. 429. 430. 431. 432. 433. 434. 435. 436. 437. 438. 439. 440. 441. 442. 443. 444. 445. 446. 447. 448. 449. 450. 451. 452. 453. 454. 455. 456. 457. 458. 459. 460. 461. 462. 463. 464. 465. 466. 467. 468. 469. 470. 471. 472. 473. 474. 475. 476. 477. 478. 479. 480. 481. 482. 483. 484. 485. 486. 487. 488. 489. 490. 491. 492. 493. 494. 495. 496. 497. 498. 499. 500. 501. 502. 503. 504. 505. 506. 507. 508. 509. 510. 511. 512. 513. 514. 515. 516. 517. 518. 519. 520. 521. 522. 523. 524. 525. 526. 527. 528. 529. 530. 531. 532. 533. 534. 535. 536. 537. 538. 539. 540. 541. 542. 543. 544. 545. 546. 547. 548. 549. 550. 551. 552. 553. 554. 555. 556. 557. 558. 559. 560. 561. 562. 563. 564. 565. 566. 567. 568. 569. 570. 571. 572. 573. 574. 575. 576. 577. 578. 579. 580. 581. 582. 583. 584. 585. 586. 587. 588. 589. 590. 591. 592. 593. 594. 595. 596. 597. 598. 599. 600. 601. 602. 603. 604. 605. 606. 607. 608. 609. 610. 611. 612. 613. 614. 615. 616. 617. 618. 619. 620. 621. 622. 623. 624. 625. 626. 627. 628. 629. 630. 631. 632. 633. 634. 635. 636. 637. 638. 639. 640. 641. 642. 643. 644. 645. 646. 647. 648. 649. 650. 651. 652. 653. 654. 655. 656. 657. 658. 659. 660. 661. 662. 663. 664. 665. 666. 667. 668. 669. 670. 671. 672. 673. 674. 675. 676. 677. 678. 679. 680. 681. 682. 683. 684. 685. 686. 687. 688. 689. 690. 691. 692. 693. 694. 695. 696. 697. 698. 699. 700. 701. 702. 703. 704. 705. 706. 707. 708. 709. 710. 711. 712. 713. 714. 715. 716. 717. 718. 719. 720. 721. 722. 723. 724. 725. 726. 727. 728. 729. 730. 731. 732. 733. 734. 735. 736. 737. 738. 739. 740. 741. 742. 743. 744. 745. 746. 747. 748. 749. 750. 751. 752. 753. 754. 755. 756. 757. 758. 759. 760. 761. 762. 763. 764. 765. 766. 767. 768. 769. 770. 771. 772. 773. 774. 775. 776. 777. 778. 779. 780. 781. 782. 783. 784. 785. 786. 787. 788. 789. 790. 791. 792. 793. 794. 795. 796. 797. 798. 799. 800. 801. 802. 803. 804. 805. 806. 807. 808. 809. 810. 811. 812. 813. 814. 815. 816. 817. 818. 819. 820. 821. 822. 823. 824. 825. 826. 827. 828. 829. 830. 831. 832. 833. 834. 835. 836. 837. 838. 839. 840. 84

518 51

560.1300550 M-12  
575

550  
1 0.00 Hz

8

Cx2 15.00 cm

|         |            |
|---------|------------|
| F2114.0 | 7.245 DPM  |
| F2114.0 | 5829.41 Hz |

|      |           |
|------|-----------|
| F2M1 | 0.018 ppm |
| F2M1 | 39.22 Hz  |

**FIL0 3015.70 Hz**

FINI 396.70 Hz  
END0404 0.47717 sec/ft

|          |           |        |
|----------|-----------|--------|
| 1.284204 | 230.94615 | Hz/EN  |
| 1.199964 | 0.46375   | psm/cm |

[illegible]

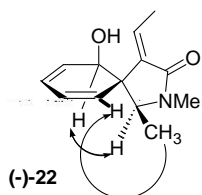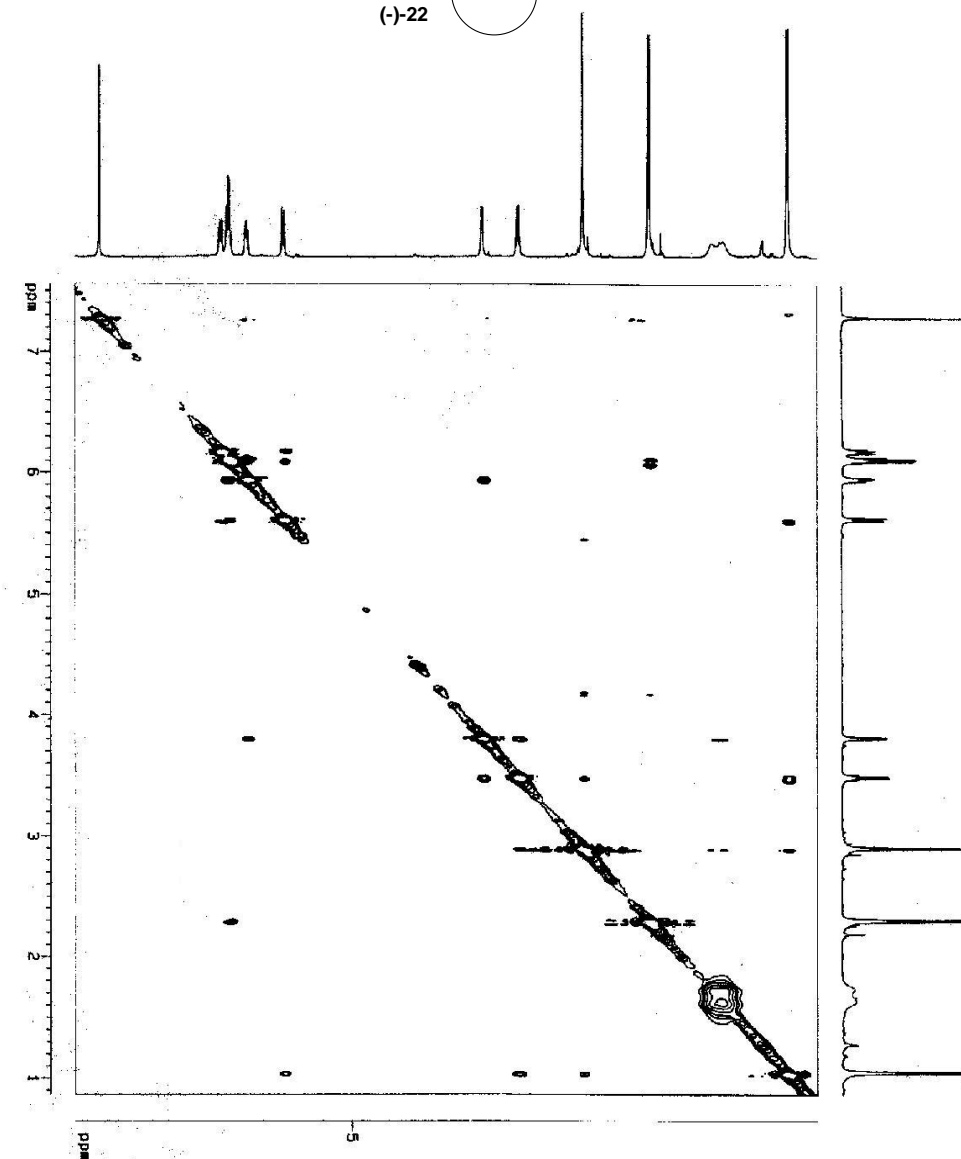

Current Data Parameters  
NAME: (-)-22  
EXPNO: 2  
PROCNO: 1

F2 - Acquisition Parameters  
Date\_: 20050606  
Time: 16.36  
INSTRUM: spect  
PROBHD: 5 mm BBI H1-  
PULPROG: zgpg30  
TD: 65536  
SOLVENT: DMSO-d6  
NS: 4  
DS: 4  
SWH: 4054.359 Hz  
FIDRES: 0.210950 Hz  
AQ: 0.210950 Hz  
RG: 512  
DE: 103.000 kHz  
TE: 300.2 K  
D1: 1.50 sec  
d11: 2.0000000 sec  
P1: 0.12 sec  
PC: 0.0000000 sec  
SFO1: 500.136050 MHz  
NUC1AS: 1H  
RG: 512  
AQ: 0.00018500 sec

F1 - Acquisition Parameters  
NO: 2  
TO: 2.47  
SI: 32768  
SF: 500.136050 MHz  
FIDRES: 0.210950 Hz  
SFO1: 500.136050 MHz  
RG: 512

F2 - Processing parameters  
SI: 32768  
SF: 500.136050 MHz  
WDW: EM  
SSB: 0  
LB: 0.00 Hz  
GB: 0  
PC: 1.00

F1 - Processing parameters  
SI: 32768  
SF: 500.136050 MHz  
WDW: EM  
SSB: 0  
LB: 0.00 Hz  
GB: 0  
PC: 1.00

2D NMR plot parameters  
C1D2: 18.00 cm  
C1D1: 18.00 cm  
F2A2: 3776.79 Hz  
F2A1: 0.000 ppm  
F2B1: 452.123 Hz  
F2B2: 0.000 ppm  
F1A2: 3776.09 Hz  
F1A1: 0.000 ppm  
F1B1: 384.26 Hz  
F1B2: 0.000 ppm  
F1C1: 0.000 ppm  
F1C2: 0.000 ppm  
F1C3: 0.000 ppm  
F1C4: 0.000 ppm  
F1C5: 0.000 ppm  
F1C6: 0.000 ppm  
F1C7: 0.000 ppm  
F1C8: 0.000 ppm  
F1C9: 0.000 ppm  
F1C10: 0.000 ppm  
F1C11: 0.000 ppm  
F1C12: 0.000 ppm  
F1C13: 0.000 ppm  
F1C14: 0.000 ppm  
F1C15: 0.000 ppm  
F1C16: 0.000 ppm  
F1C17: 0.000 ppm  
F1C18: 0.000 ppm  
F1C19: 0.000 ppm  
F1C20: 0.000 ppm  
F1C21: 0.000 ppm  
F1C22: 0.000 ppm  
F1C23: 0.000 ppm  
F1C24: 0.000 ppm  
F1C25: 0.000 ppm  
F1C26: 0.000 ppm  
F1C27: 0.000 ppm  
F1C28: 0.000 ppm  
F1C29: 0.000 ppm  
F1C30: 0.000 ppm  
F1C31: 0.000 ppm  
F1C32: 0.000 ppm  
F1C33: 0.000 ppm  
F1C34: 0.000 ppm  
F1C35: 0.000 ppm  
F1C36: 0.000 ppm  
F1C37: 0.000 ppm  
F1C38: 0.000 ppm  
F1C39: 0.000 ppm  
F1C40: 0.000 ppm  
F1C41: 0.000 ppm  
F1C42: 0.000 ppm  
F1C43: 0.000 ppm  
F1C44: 0.000 ppm  
F1C45: 0.000 ppm  
F1C46: 0.000 ppm  
F1C47: 0.000 ppm  
F1C48: 0.000 ppm  
F1C49: 0.000 ppm  
F1C50: 0.000 ppm  
F1C51: 0.000 ppm  
F1C52: 0.000 ppm  
F1C53: 0.000 ppm  
F1C54: 0.000 ppm  
F1C55: 0.000 ppm  
F1C56: 0.000 ppm  
F1C57: 0.000 ppm  
F1C58: 0.000 ppm  
F1C59: 0.000 ppm  
F1C60: 0.000 ppm  
F1C61: 0.000 ppm  
F1C62: 0.000 ppm  
F1C63: 0.000 ppm  
F1C64: 0.000 ppm  
F1C65: 0.000 ppm  
F1C66: 0.000 ppm  
F1C67: 0.000 ppm  
F1C68: 0.000 ppm  
F1C69: 0.000 ppm  
F1C70: 0.000 ppm  
F1C71: 0.000 ppm  
F1C72: 0.000 ppm  
F1C73: 0.000 ppm  
F1C74: 0.000 ppm  
F1C75: 0.000 ppm  
F1C76: 0.000 ppm  
F1C77: 0.000 ppm  
F1C78: 0.000 ppm  
F1C79: 0.000 ppm  
F1C80: 0.000 ppm  
F1C81: 0.000 ppm  
F1C82: 0.000 ppm  
F1C83: 0.000 ppm  
F1C84: 0.000 ppm  
F1C85: 0.000 ppm  
F1C86: 0.000 ppm  
F1C87: 0.000 ppm  
F1C88: 0.000 ppm  
F1C89: 0.000 ppm  
F1C90: 0.000 ppm  
F1C91: 0.000 ppm  
F1C92: 0.000 ppm  
F1C93: 0.000 ppm  
F1C94: 0.000 ppm  
F1C95: 0.000 ppm  
F1C96: 0.000 ppm  
F1C97: 0.000 ppm  
F1C98: 0.000 ppm  
F1C99: 0.000 ppm  
F1C100: 0.000 ppm

HPLC trace for Dienol **22** (racemic and non racemic)

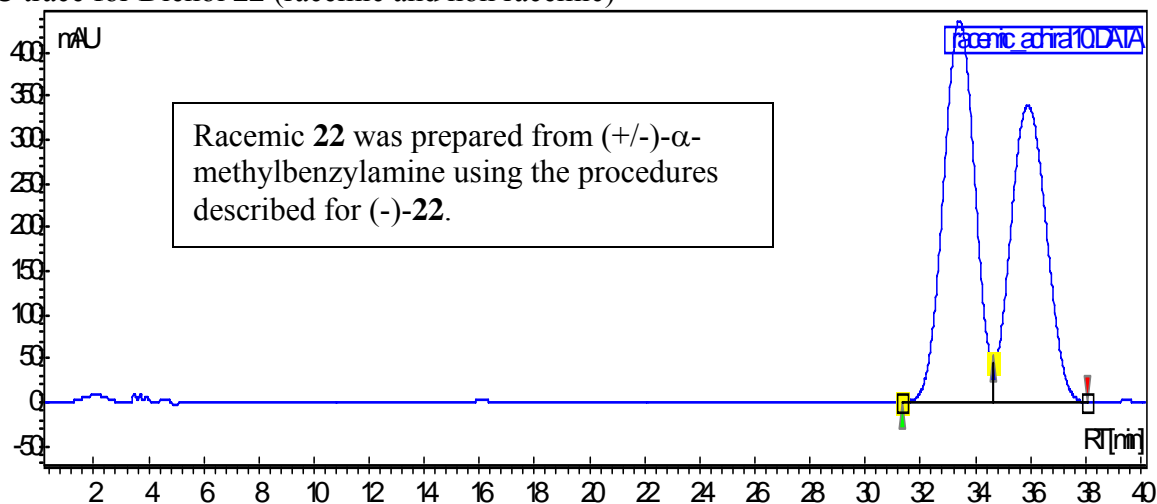

| # | Name   | Area % [%] | Time [Min] |
|---|--------|------------|------------|
| 1 | Peak 1 | 53.090     | 33.41      |
| 2 | Peak 2 | 46.910     | 35.91      |

Total 100.000

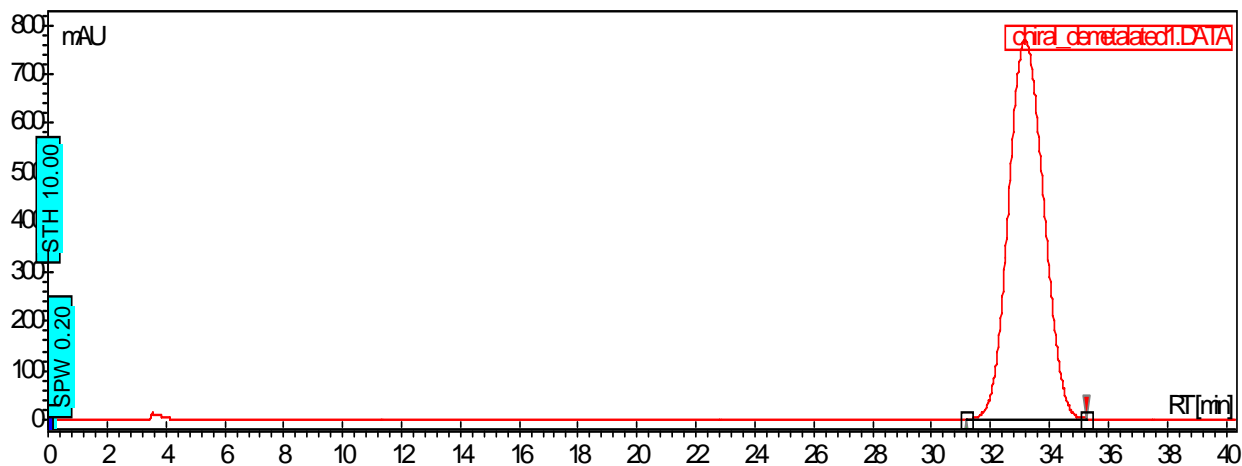

| # | Name | Time [Min] | Area % [%] |
|---|------|------------|------------|
| 1 | Peak | 33.16      | 100.000    |

Total 100.000

Column: ChiralPak AD-H 4.6 x 250 mm  
Eluent: 96:4 Hexanes:IPA
